1 **Title:**

2 **Overriding defective FPR chemotaxis signaling in diabetic neutrophil**  
3 **stimulates infection control in diabetic wound**

4  
5 **Authors:**

6 Ruchi Roy <sup>1,2†</sup>, Janet Zayas <sup>1,2,3†</sup>, Stephen J. Wood <sup>3</sup>, Mohamed F. Mohamed <sup>1,2</sup>, Dulce M.  
7 Frausto <sup>1,2</sup>, Ricardo Estupinian <sup>1,2</sup>, Eileena F. Giurini <sup>1,2</sup>, Timothy M. Kuzel <sup>1,2</sup>, Andrew Zloza <sup>1,2</sup>,  
8 Jochen Reiser <sup>1</sup>, and Sasha H. Shafikhani <sup>1,2,3\*</sup>.

9  
10 **Affiliations:**

11 <sup>1</sup>Department of Medicine

12 <sup>2</sup>Division of Hematology/Oncology/Cell Therapy

13 <sup>3</sup>Department of Microbial Pathogens and Immunity

14 <sup>1,2,3</sup>Rush University Medical Center, Chicago, IL, USA

15 † These authors contributed equally to this manuscript.

16  
17 \* To whom correspondence should be addressed: [Sasha\\_Shafikhani@rush.edu](mailto:Sasha_Shafikhani@rush.edu)

18  
19 **Keywords:** Diabetes; db/db; Wound; Wound healing; Infection; *Pseudomonas aeruginosa*; Innate  
20 immunity; Neutrophils; Cytokines; Chemokines; CCL3 (MIP-1 $\alpha$ ); Chemotactic Response; FPR1; CCR1.

21

22           **Abstract**

23           Infection is a major co-morbidity that contributes to impaired healing in diabetic wounds.  
24    Although impairments in diabetic neutrophils have been blamed for this co-morbidity, what  
25    causes these impairments and whether they can be overcome, remain largely unclear. Diabetic  
26    neutrophils, extracted from diabetic individuals, exhibit chemotaxis impairment but this peculiar  
27    functional impairment has been largely ignored because it appears to contradict the clinical  
28    findings which blame excessive neutrophil influx (neutrophilia) as a major impediment to  
29    healing in chronic diabetic ulcers. Here, we report that exposure to glucose in diabetic range  
30    results in impaired chemotaxis signaling through the FPR1 chemokine receptor in neutrophils,  
31    culminating in reduced chemotaxis and delayed neutrophil trafficking in wound in diabetic  
32    animals, and rendering diabetic wound vulnerable to infection. We further show that at least  
33    some auxiliary chemokine receptors remain functional under diabetic conditions and their  
34    engagement by the pro-inflammatory cytokine CCL3, overrides the requirement for FPR1  
35    signaling and substantially improves infection control by jumpstarting the neutrophil response  
36    toward infection, and stimulates healing in diabetic wound. We posit that CCL3 may have real  
37    therapeutic potential for the treatment of diabetic foot ulcers if it is applied topically after the  
38    surgical debridement process which is intended to reset chronic ulcers into acute fresh wounds.

39

40

## 41            **Introduction**

42            Diabetic foot ulcers are the leading cause of lower extremity amputations in the United  
43 States and are responsible for more hospitalizations than any other complication of diabetes (*1-*  
44 *5*). Infection with pathogenic bacteria, such as *Pseudomonas aeruginosa*, is a major co-morbidity  
45 that contributes to impaired healing in diabetic ulcers (*6-10*). Phagocytic leukocytes, particularly  
46 neutrophils (PMNs), play a major role defending wounds from invading pathogens (*11*).  
47 Neutrophil is the first inflammatory leukocyte that infiltrates into the wound (*12*). In addition to  
48 its antimicrobial functions mediated by phagocytosis, bursts of reactive oxygen species (ROS),  
49 antimicrobial (AMP) production, and neutrophil extracellular trap (NET) (*13, 14*), it also  
50 expresses various cytokines and chemokines that set the stage for the subsequent inflammatory  
51 and non-inflammatory responses, which further contribute to infection control and partake in  
52 healing processes (*15-19*). There appears to be a disconnect in that diabetic ulcers suffer from  
53 persistent non-resolving inflammation - characterized by increased neutrophils - yet they fail to  
54 control infection. Bactericidal functional impairments in diabetic neutrophils (PMNs) is thought  
55 to underlie defective infection control in diabetic wound (*20, 21*). What causes these  
56 impairments in diabetic neutrophils remains poorly understood, although the impairment severity  
57 has been associated with the degree of hyperglycemia (*20*), suggesting that exposure to high  
58 glucose levels may be to blame.

59            In addition to impaired bactericidal functions, diabetic neutrophils - (purified from the  
60 blood of diabetic patients) - also exhibit impaired chemotactic response (*22*). This peculiar  
61 functional impairment in diabetic neutrophils has not received much attention primarily because  
62 it appears to contradict the clinical findings which finds and blames excessive neutrophil  
63 response as a major impediment to healing in chronic diabetic ulcers (*23, 24*). Driven by this  
64 disconnect and in lieu of the fact that very little is known about neutrophil trafficking into

65 diabetic wounds particularly early after injury and in response to infection, we sought to assess  
66 the possible impact of diabetic neutrophil chemotaxis impairment on the dynamics of neutrophil  
67 response and impaired infection control in diabetic wounds.

68

## 69 **Results**

70 **Neutrophil trafficking is delayed in diabetic wounds.** We generated full-thickness  
71 excisional wounds in db/db type 2 diabetic mice and their normal littermates C57BL/6, as  
72 described (10, 25), and challenged these wounds with PA103 *P. aeruginosa* bacteria ( $10^3$  CFU),  
73 which we have shown to establish a robust and persistent infection and cause wound damage in  
74 diabetic mice (10). Consistent with our previous report (10), db/db wounds contained 2-4 log  
75 orders more bacteria than normal wounds, indicating that diabetic wounds are vulnerable to  
76 increased infection (Fig. S1). We next collected wound tissues on days 1, 3, 6, and 10 post-  
77 infection and assessed them for their neutrophil contents by immunohistochemistry (IHC) using  
78 the neutrophil marker Ly6G (26, 27). Surprisingly, diabetic wounds exhibited substantially  
79 reduced neutrophil influx in diabetic wounds early after injury at days 1 and 3 but significantly  
80 higher neutrophil contents in day 6 and day 10 older diabetic wounds, as compared to normal  
81 wounds (Fig. 1a-b). Corroborating these data, myeloperoxidase (MPO) - (a marker for primarily  
82 activated neutrophils (28)) - was also substantially reduced in diabetic wounds early after injury  
83 at days 1 and 3 but significantly higher in day 10 wounds (Fig. 1c). Assessment of neutrophil  
84 contents in normal and diabetic infected day 1 wounds by flow cytometry - where neutrophils  
85 were identified as  $CD45^+Ly6C/G^{hi}CD11b^{hi}$  (29, 30) - further corroborated the inadequate  
86 neutrophil trafficking into diabetic wounds early after injury (Fig. 1d and Fig. S2). These data  
87 indicated that neutrophil response - (which is needed to combat infection) - is delayed in  
88 diabetic wounds, rendering these wounds vulnerable to infection early after injury.

89

90 **Chemotactic response through the FPR chemokine receptor is impaired in diabetic**

91 **neutrophils.** Depending on the tissue or the condition, neutrophil trafficking in response to  
92 injury and/or infection occurs in multiple waves mediated by ~30 chemokine receptors on  
93 neutrophils and involves multiple signaling pathways (31-37). However, the initial neutrophil  
94 chemotaxis in response to injury or infection involves the activation of G protein-coupled formyl  
95 peptide chemokine receptors (e.g., FPR1) by *N*-formyl peptides, such as fMet-Leu-Phe (fMLF,  
96 a.k.a., fMLP), which is released either by injured tissues or by invading bacteria (31, 38).  
97 Activation of FPR receptors then leads to the upregulation and secretion of lipid signals, such as  
98 the leukotriene B<sub>4</sub> (LTB<sub>4</sub>), which in turn activate BLT1, (another G protein-coupled receptor on  
99 neutrophils), amplifying neutrophil trafficking by enhancing the signaling through the FPR  
100 chemokine receptors (36). BLT1 activation in neutrophils by LTB<sub>4</sub> also results in upregulation  
101 and secretion of pro-inflammatory cytokines, particularly IL-1 $\beta$  which in turn induces the  
102 expression and secretion of other chemokine ligands (i.e, CCL3 and CXCL1) in tissue resident  
103 epithelial cells and inflammatory leukocytes, which further amplify neutrophil trafficking and  
104 other inflammatory leukocytes including monocytes, by engaging their respective auxiliary  
105 chemokine receptors, such as CCR1 and CXCR2 (36, 37, 39, 40).

106 To assess the role of chemotaxis impairment in reduced neutrophil influx into diabetic  
107 wounds early after injury, we extracted neutrophils from blood of normal and diabetic mice and  
108 assessed chemotaxis signaling through FPR in response to fMLF. Compared to normal  
109 neutrophils extracted from C57B, db/db neutrophils were significantly impaired in their ability to  
110 chemotax toward fMLP (Fig. 2a). Consistent with reduced signaling through the FPR chemokine  
111 receptor, expression of FPR1 was significantly diminished in db/db neutrophils, as assessed by  
112 Western blotting (Fig. 2b-c). Further corroborating these data, the percentage of FPR1-positive

113 neutrophils was significantly reduced in day 1 diabetic wounds, after accounting for reduced  
114 number of neutrophils in diabetic wounds early after injury by assessing equal number of  
115 neutrophils by flow cytometry (Fig. 2d).

116 Various studies have shown direct correlations between plasma glucose levels and  
117 prevalence and/or severity of infection in diabetic patients (41-43), suggesting that exposure to  
118 high glucose levels may be responsible for impaired neutrophil functions in diabetes. Consistent  
119 with these reports, short-term and long-term glycemic control in diabetic rats, significantly  
120 improved their ability to control *Staphylococcus aureus* infection (44). To assess the impact of  
121 high glucose on signaling through the FPR chemokine receptor, we purified neutrophils from  
122 human blood and C57B mice bone marrow (Fig. S4a-c and Materials & Methods), incubated  
123 them in media containing glucose in the normal range (90 mg/dl) or in the diabetic range (200-  
124 500 mg/dl) for 1h, and evaluated their chemotactic responses toward fMLF. (Of note, 1h  
125 exposure to high glucose in diabetic range had no effect on viability of neutrophils).

126 Exposure to high glucose levels caused significant reduction in chemotactic response to  
127 fMLF in both human and mouse neutrophils (Fig. 2e-f). While neutrophils exposed to normal  
128 glucose showed a bell-shaped curve in their chemotaxis response toward fMLF concentrations  
129 (0.01- 1000nM) with 100nM being the optimum concentration, neutrophils exposed to high  
130 glucose showed flat chemotaxis response toward these fMLF concentrations, trending toward  
131 lower chemotaxis at higher concentrations (Fig. S4d), indicating that high fMLF ligand  
132 concentrations cannot rescue chemotaxis signaling through FPR1 receptor. The bell-shaped  
133 response to fMLF in normal neutrophils is in line with previous reports showing reduction in  
134 neutrophil chemotactic responses to other ligands at high concentrations (45, 46). Of note,  
135 exposure to high glucose also caused drastic reductions in FPR1 and PLC $\gamma$  protein levels, as well  
136 as cAMP levels (Fig. 2i-k), which are all required to mediate FPR-mediated chemotaxis in

137 neutrophils (36, 47, 48). Corroborating these data, exposure to high glucose resulted in  
138 significant reductions in the FPR1 and PLC $\gamma$  transcription as determined by mRNA analysis by  
139 RT-PCR (Fig. 2l-m). Collectively, these data indicated that elevated glucose levels in diabetes is  
140 responsible for the reduced chemotactic response through the FPR1 chemokine receptor in  
141 diabetic neutrophils.

142

143 **Some auxiliary chemokine receptors remain functional under diabetic conditions.**

144 Although, the initial neutrophil chemotactic response through the FPR receptors and the  
145 amplification of neutrophil chemotactic responses via other auxiliary chemokine receptors are  
146 interconnected and occur sequentially *in vivo* (32-37), none of these receptors appear to be  
147 essential on their own and their defects can be overcome by engaging other receptors (37, 49,  
148 50). Chronic diabetic ulcers suffer from increased neutrophil contents (23, 24), indicating that  
149 diabetic neutrophils are capable of migrating into the wound, albeit at dysregulated kinetics as  
150 our data show (Fig. 1). Together, these findings suggested that chemotactic responses of diabetic  
151 neutrophils - though impaired through the FPR1 receptor (Fig. 2) - may be functional through  
152 one or more auxiliary chemokine receptors that mediate the amplification phase of neutrophil  
153 trafficking in wound and toward infection.

154 To evaluate this possibility, we assessed chemotactic responses toward CCL3 in human  
155 and mouse neutrophils after 1h exposure to glucose at normal or diabetic levels. The reason we  
156 focused on CCL3 was because it activates multiple auxiliary chemokine receptors, namely  
157 CCR1, CCR4, and CCR5 (51-53). Of note, CCR1 is an important chemokine receptor that is  
158 implicated in neutrophil trafficking to post-ischemic tissues (54) and ischemia is an important  
159 co-morbidity associated with impaired healing in diabetic wound (2, 55). Data indicated that  
160 exposure to glucose in the diabetic range did not affect the chemotactic responses toward CCL3

161 in human or mouse neutrophils (Fig. 3a-b), suggesting that these auxiliary receptors are  
162 unaffected by high glucose. To corroborate these data, we assessed the impact of high glucose  
163 exposure on CCR1 auxiliary chemokine receptor. In line with chemotaxis data, CCR1 expression  
164 remained unaffected in neutrophils after exposure to high glucose as assessed by Western  
165 blotting (Fig. 3c-d), by mRNA analysis (Fig. 3e), and by surface expression analysis (Fig. 3f).  
166 Further corroborating these data, CCR1 expression was similar in neutrophils extracted from the  
167 blood of db/db and C57B mice (Fig. 3h-i), and the percentage of CCR1-positive neutrophils in  
168 db/db day 1 wounds were similar to C57B day 1 wounds, after accounting for the reduced  
169 number of leukocytes in day 1 diabetic wounds by assessing equal number of neutrophils by  
170 flow cytometry (Fig. 3j). Of note, surface expression of auxiliary chemokine receptor CXCR2,  
171 (another important auxiliary chemokine receptor involved in the amplification of neutrophil  
172 response in wound and toward infection (31, 56)), on neutrophils and chemotaxis through the  
173 CXCR2 in response to CXCL1 (a.k.a. KC) - a known ligand for CXCR2 (57) - were also  
174 unaffected by high glucose exposure in neutrophils (Fig. S5). Collectively, these data suggested  
175 that at least CCR1 and CXCL2 auxiliary chemokine receptors may remain functional under  
176 diabetic conditions.

177 **Topical treatment with CCL3 bypasses the requirement for FPR signaling and**  
178 **enhances neutrophil trafficking and infection control in diabetic wound.** If CCL3 can rescue  
179 neutrophil chemotactic response in a situation where FPR signaling is impaired as our data  
180 indicate (Fig. 3a-b), why is neutrophil trafficking so severely diminished in diabetic wounds  
181 early after injury (Fig. 1). As discussed above, production of ligands for auxiliary chemokine  
182 receptors in tissue ultimately depends on FPR chemokine receptor activation (36, 37, 39, 40),  
183 suggesting that CCL3 expression may also be reduced in diabetic wounds early after injury. In  
184 line with this notion, CCL3 expression was substantially reduced in day 1 diabetic wounds, as



185 assessed by mRNA analysis and Western blotting, after accounting for reduced number of  
186 leukocytes by normalizing the data with 18S or GAPDH loading control respectively (Fig. 4a-c).  
187 These data suggested that although auxiliary chemokine receptors on neutrophils may be  
188 functional in diabetic neutrophils, they may not be functioning in diabetic wounds early after  
189 injury because of inadequate ligands. If this is the case, augmenting diabetic wounds with CCL3  
190 early after injury should be able to overcome deficiency in the FPR signaling and enhance  
191 neutrophil migration into diabetic wounds.

192 To test our hypothesis, we treated db/db wounds topically with CCL3 (1 $\mu$ g/wound) prior  
193 to infection and assessed its impact neutrophil response and infection control in diabetic wounds.  
194 One-time topical treatment with CCL3 significantly increased neutrophil trafficking in day 1  
195 diabetic wounds, as assessed by Ly6G histological analysis (Fig. 4d-e), by flow cytometry (Fig.  
196 4f), and by MPO analysis (Fig. 4g). Importantly, CCL3 treatment significantly enhanced the  
197 ability of diabetic wounds to control infection, as demonstrated by nearly a 2 log-order reduction  
198 in the number of bacteria contained in the CCL3-treated db/db wounds (Fig. 4h).

199 To assess the dependence enhanced infection control on neutrophils in CCL3-treated  
200 diabetic wounds, we depleted db/db mice of neutrophils by anti-Ly6G antibody (58), 24h prior to  
201 wounding and assessed the impact of neutrophil depletion on the ability of CCL3-treated db/db  
202 wounds to control *P. aeruginosa* infection. Anti-Ly6G reduced the neutrophil contents in  
203 circulation by ~97% and in wound by ~75% (Fig. 4i and Fig. S5a-b). Neutrophil-depletion  
204 resulted in 2 log-order more bacteria in diabetic wounds, indicating that despite their known  
205 bactericidal functional impairments (20, 21), diabetic neutrophils still contribute to infection  
206 control in these wounds (Fig. 4j). Importantly, neutrophil-depletion completely abrogated  
207 CCL3's beneficial effects in boosting antimicrobial defenses against *P. aeruginosa* in diabetic

208 wounds (Fig. 4j), indicating that CCL3-induced enhanced infection control in diabetic wound is  
209 completely dependent on its ability to enhance neutrophil response in diabetic wound.

210

211 **Treatment with CCL3 does not lead to persistent non-resolving inflammation in**  
212 **infected diabetic wounds and stimulates healing.** Although, treatment with CCL3 substantially  
213 improved diabetic wound's ability to control infection by enhancing neutrophil response toward  
214 infection early after injury in day 1 wounds (Fig. 4), it remained a possibility that CCL3  
215 treatment could have long-term adverse consequences, as it could lead to heightened  
216 inflammatory environment which would be detrimental to the process of tissue repair and  
217 healing in diabetic wounds. Afterall, persistent non-resolving inflammation, (as manifested by  
218 increases in pro-inflammatory cytokines and neutrophils), is considered a major contributor to  
219 healing impairment in diabetic foot ulcers (23, 24).

220 We assessed the long-term impact of CCL3 treatment on neutrophil responses in diabetic  
221 wound. Data indicated that while neutrophils continued to rise in the mock-treated db/db infected  
222 wounds as they aged, in the CCL3-treated diabetic wounds, neutrophils were significantly higher  
223 during the acute phase of healing early after injury on days 1 and 3 but declined substantially in  
224 old wounds on days 6 and 10 (Fig. 5a-b).

225 Encouragingly, CCL3 treatment also significantly stimulated healing in infected diabetic  
226 wounds, as assessed by wound area measurement (Fig. 6a-b), while mock-treated diabetic  
227 wounds became exacerbated as the result of *P. aeruginosa* infection, as we had previously shown  
228 (10). Corroborating these results, CCL3-treated infected diabetic wounds were completely re-  
229 epithelized and exhibited epidermal thickening as assessed by H&E histological analysis, while  
230 mock-treated infected diabetic wounds became exacerbated (Fig. 6c-d).

231 Fibroblasts and myofibroblasts are key players in extracellular matrix production and  
232 granulation tissue maturation during the proliferation and the remodeling phases of wound  
233 healing (59-61). However, persistent inflammatory environment in diabetic wounds adversely  
234 impacts the functions of fibroblast and myofibroblast, culminating in reduced collagen and  
235 elastin extracellular matrix deposition and impaired healing in diabetic chronic wounds (19, 62,  
236 63). *P. aeruginosa* infection further exacerbates inflammation and reduces collagen deposition in  
237 diabetic wounds (10). We evaluated the impact of CCL3 treatment on fibroblast, myofibroblast,  
238 collagen, and elastin in day 10 diabetic wounds, using their respective markers: Vimentin,  $\alpha$ -  
239 SMA, Elastin, and Masson's Trichrome staining (10, 59, 64). CCL3-treated wounds showed  
240 significant increases in all these healing markers (Fig. 6e-f and Fig. S7). Collectively, these data  
241 indicate that diabetic wounds are not destined to develop persistent non-resolving inflammation,  
242 provided that the dynamics of neutrophil trafficking is restored in these wounds early after  
243 injury.

244

## 245 Discussion

246 Diabetic wounds are highly susceptible to infection with pathogenic bacteria, such as *P.*  
247 *aeruginosa*, which in turn drives these wounds toward persistent non-resolving inflammation and  
248 contributes to impaired healing (10, 23, 24). Here, we demonstrate that early after injury, the  
249 diabetic wound exhibits a paradoxical and damaging decrease in essential neutrophil trafficking,  
250 which in turn renders diabetic wounds vulnerable to infection. Our data point to impaired  
251 signaling through the FPR1 chemokine receptor (resulting from exposure to high glucose levels),  
252 as an important culprit responsible for the delay in the neutrophil influx in response in diabetic  
253 wounds early after injury.

254 It is worth noting that 1h exposure to high glucose levels dramatically impaired  
255 chemotaxis signaling through the FPR1, suggesting that even a short-term rise in serum glucose  
256 levels could potentially make non-diabetic people transiently immunocompromised and  
257 susceptible to infection. In line with this notion, hyperglycemia during the perioperative and  
258 postoperative periods are found to be significant risk factors for surgical site infections (SSIs)  
259 (65, 66), while glycemic control during the perioperative period has been shown to significantly  
260 reduce SSI rates both in human and animals (44, 66). It remains unclear why exposure to high  
261 glucose dampens the expression and signaling through the FPR1 chemokine receptor. We posit  
262 that it may involve metabolic changes, resulting from high glucose in neutrophils. We are actively  
263 investigating this possibility.

264 Our data demonstrate that at least the expression and signaling through CCR1 and  
265 CXCR2 auxiliary receptors are not adversely affected by high glucose, but they may not be  
266 signaling in diabetic wounds early after injury because of deficiency in the production of their  
267 ligands. It remains a possibility that other auxiliary chemokine receptors which amplify the  
268 neutrophil migration in wounds and toward infection (e.g, CXCR1, BLT1, etc. (31)), may also  
269 remain functional under diabetic condition and their engagement with their respective ligands  
270 could similarly enhance antimicrobial defenses in diabetic wounds. Future studies should assess  
271 these possibilities and evaluate how serum glucose level affects the expression and activity of all  
272 the ~30 chemokine receptors that mediate chemotaxis in neutrophils in diabetic individuals and  
273 toward infection.

274 It is encouraging that one-time topical treatment with CCL3 substantially boosted  
275 antimicrobial defenses and stimulated healing in diabetic wounds. However, given that diabetic  
276 foot ulcers are already suffering from neutrophilia and heightened inflammation, the therapeutic  
277 value of CCL3 treatment may seem questionable. We posit that CCL3 topical treatment may

278 have real therapeutic potential in diabetic wound care, at least in a subset of diabetic individuals  
279 represented by our animal model, if applied topically after the surgical wound debridement  
280 process. The purpose of surgical debridement, which is performed as a standard-of-care weekly  
281 or biweekly in the clinics, is to convert a chronic non-healing wound environment into an acute  
282 healing environment through the removal of necrotic and infected tissue, and the senescent and  
283 non-responsive cells (67-69). Therefore, debrided wound environment is likely to be more  
284 similar to day 1 fresh wounds than day 10 chronic wounds in our studies. Future studies are  
285 needed to evaluate the therapeutic potential of CCL3 in diabetic wound care.

286

287

## 288 **Materials and Methods**

289 **Procedures related to animal studies:** We have an approval from the Rush University  
290 Medical Center Institutional Animal Care and Use Committee (IACUC) to conduct research as  
291 indicated. All procedures complied strictly with the standards for care and use of animal subjects  
292 as stated in the Guide for the Care and Use of Laboratory Animals (Institute of Laboratory  
293 Animal Resources, National Academy of Sciences, Bethesda, MD, USA). We obtained 8-week-  
294 old C57BL/6 (normal) and their diabetic littermates, C57BLKS-m *lepr<sup>db</sup>* (db/db) mice from the  
295 Jackson Laboratories (Bar Harbor, ME). These mice were allowed to acclimate to the  
296 environment for 1 week prior to experimentation. Wounding and wound infection were carried  
297 out as we described previously (10, 25). Hematoxylin & Eosin (H&E) staining were performed  
298 as we described previously (10, 27). Neutrophil trafficking into wounds was assessed by  
299 immunohistochemical (IHC) analysis using Ly6G staining as described previously (70). Wound  
300 tissues' contents of myeloperoxidase (MPO) were assessed by ELISA as described (27). CCL3  
301 expression was assessed by RT-PCR, following the protocol we described previously (25). To  
302 account for reduced neutrophil migration into day 1 diabetic wounds, data were normalized by  
303 18S RNA levels. We used *Pseudomonas aeruginosa* PA103 in these studies. This strain has been  
304 described previously (71, 72) and we have shown that it causes massive infection and  
305 exacerbates wound damage in db/db wounds (10). Infection levels in wounds were evaluated by  
306 determining the number of bacteria (colony forming unit (CFU)) per gram of wound tissues, as  
307 we described (10, 44).

308

309 **Histological analyses and wound healing assessment:** Wound healing was assessed by  
310 digital photography; by re-epithelization assessment using H&E staining; by fibroblasts and  
311 myofibroblasts tissue content analyses using vimentin and  $\alpha$ -SMA; and by elastin and collagen

312 matrix deposition assessment using elastin or Masson's Trichrome staining, using previously  
313 described techniques(10, 25, 59, 73, 74). The histological data, (obtained from  $n \geq 5$  mice/group  
314 and  $\geq 9$  random fields/wound/mouse), were normalized per wound surface area.

315

316 **Neutrophil isolation from human and mouse.** We have an Institutional Review Board  
317 (IRB)- approved protocol in accordance with the Common Rule (45CFR46, December 13, 2001)  
318 and any other governing regulations or subparts. This IRB-approved protocol allows us to collect  
319 blood samples from non-diabetic volunteers with their consents for these studies. The blood  
320 samples were first checked by a glucometer kit (FreeStyle Lite, Blood Glucose Monitoring  
321 System) to ensure that blood glucose level is within the normal range,  $\leq 100$  mg/dl. Next, human  
322 neutrophils were purified from blood using the EasySep™ Human Neutrophil Enrichment Kit  
323 (STEMCELL Technologies), according to manufacturer's protocol.

324 Murine neutrophils were isolated from either peripheral blood (used in Fig. 2a-c; Fig.  
325 S3a; Fig. 3h-i) or bone marrow (Fig. 2f-m, Fig. 3b-g, and Fig. S3d) for the studies involving  
326 glucose exposure using EasySep™ Mouse Neutrophil Enrichment Kit (STEMCELL  
327 Technologies), as per manufacture's protocol and as described previously (25, 75). Mouse  
328 neutrophils involving comparisons between C57B normal and db/db diabetic neutrophils were  
329 extracted from  $N=4$  blood pools/group, with each blood pool being from 4 mice: totaling 16 mice  
330 per group. This was to obtain enough neutrophils from mouse blood ( $\sim 0.8$  ml of blood/mouse,  
331 3.2 ml total) for analyses to achieve statistical significance.

332

333 **Neutrophil chemotactic response:** Purified human and murine neutrophils were  
334 incubated in (IX HBSS with 2% HSA) containing glucose at indicated concentrations for 1h at

335 37°C and stained with Calcein AM (5µg/mL) for 30 minutes. After washing the cells, the cell  
336 migration assay was performed *in vitro* using 96-well disposable chemotaxis chambers (Cat. No.  
337 106-8, Neuro Probe, Gaithersburg, MD, USA). Neutrophils chemotaxis toward the  
338 chemoattractants (chemokines) were performed at indicated concentrations, or PBS (to account  
339 for the background neutrophil migration), following the manufacturer's protocol. Cell migration  
340 was assessed by a fluorescence (excitation at 485nm, emission at 530nm) plate reader Cytation 3  
341 Cell Imaging Multi-Mode Reader (Biotek Instruments, Inc). The actual chemotaxis values were  
342 obtained by subtracting random chemotaxis values (PBS) from the chemotaxis values in  
343 response to chemokines.

344

#### 345 **Flow cytometry:**

346 **Wound tissue digestion and flow cytometric.** C57B and db/db wound tissues were  
347 obtained at indicated timepoints as described (25), weighed, and place immediately in cold  
348 HBSS (Mediatech, Inc., Manassas, VA). Subcutaneous fat was removed using a scalpel and  
349 scissors were used to cut the tissue into small <2mm pieces. The tissue was enzymatically  
350 dissociated in DNase I (40µg/ml; Sigma-Aldrich Co., St. Louis, MO) and Collagenase D  
351 (1mg/ml HBSS; Roch Diagnostics, Indianapolis, IN) at 37°C for 30 minutes. Cold PBS was used  
352 to stop the dissociation process. The tissue was then mechanically dissociated using the  
353 gentleMACS octoDissociator (program B; Miletynyi Biotec, Auburn, CA) and passed through  
354 70µm nylon screens into 50ml conical tubes. Cells were washed twice with PBS. Resultant  
355 single-cell suspensions were stained using the indicated fluorescently labeled antibodies against  
356 cell surface markers, according to standard protocols described previously (76, 77). All  
357 antibodies were purchased from eBioscience, Inc. (San Diego, CA). Flow cytometry was  
358 performed using a the LSRFortessa cell analyzer (Becton, Dickinson, and Company)) and data



359 were analyzed using FlowJo software (Tree Star, Ashland, OR), as previously described (25, 78).  
360 Briefly, for the gating strategy, Live singlet lymphocytes were identified by gating on forward  
361 scatter-area (FSC-A) versus (vs.) side scatter-area (SSC-A), then LIVE/DEAD staining vs. SSC-  
362 A, FSC-A vs. FSC-height (H), SSC-A vs. SSC-H, FSC-width (W) vs SSC-W, and CD45 vs  
363 SSC-A. T cells, B cells, and NK cells were excluded using antibodies against CD3, CD19, and  
364 NK1.1, respectively, all on one channel as a dump gate. Neutrophils were then identified using  
365 CD11b vs Ly6G staining, with neutrophils being CD11b high and Ly6G high. FPR1 and CCR1  
366 expression on neutrophils was then analyzed and is presented as percentage of cells (e.g.,  
367 neutrophils) expressing the respective marker.

368

369 **Neutrophil depletion in mice.** Neutrophil depletion in mice were performed as described  
370 (58, 79). Briefly, db/db mice received either anti-Ly6G (100 $\mu$ g/mouse) to cause neutrophil  
371 depletion or an IgG isoform control (100 $\mu$ g/mouse), by intraperitoneal (i.p.) injection. Neutrophil  
372 depletion was confirmed by the assessment of neutrophil content in the blood (circulation) by  
373 flow cytometry or in wound tissues by MPO analysis.

374

375 **Western blot analyses:** We performed Western immunoblotting on cell lysates or on  
376 tissue lysates, using the indicated antibodies as we described previously (27, 71, 80). Equal  
377 amounts of proteins (as determined by BCA analysis) were loaded. GAPDH was used as a  
378 loading control.

379

380 **Gene expression analysis by Real-Time Polymerase Chain Reaction (RT-PCR):**  
381 Gene expression was assessed by RT-PCR as we described (25): cDNA was generated using

382 SuperScript™ III First-Strand Synthesis System cDNA Synthesis Kit (Cat. No. 18080051) from  
383 Thermo Fisher, according to manufacturer's protocol. RT-PCR was then performed with gene-  
384 specific primer pairs mentioned below, using the Applied Biosystems QuantStudio™ 7 Flex  
385 Real-Time PCR System. The data were calculated using the  $2^{-\Delta\Delta Ct}$  method and were presented as  
386 ratio of transcripts for gene of interest normalized to 18S. We performed RT-PCR using the  
387 following primers: FPR1 forward: GAGCCTAGCCAAGAAGGTAATC, reverse:  
388 TCCCTGGTCCAAGTCTACTATT; Phospholipase C gamma 1 (Plcg1) forward:  
389 GGTGAGGCCAAATGTGAGATA, reverse: GGGCAACCAAGAGGAATGA; Chemokine (C-  
390 C motif) receptor 1 (Ccr1) forward: GCTATGCAGGGATCATCAGAAT, reverse:  
391 GGTCCAGAGGAGGAAGAATAGA; Chemokine (C-C motif) ligand 3 (Ccl3) forward:  
392 TCACTGACCTGGAAGTGAATG, reverse: CAGCTTATAGGAGATGGAGCTATG; 18S  
393 forward: CACGGACAGGATTGACAGATT, reverse: GCCAGAGTCTCGTTCGTTATC.

394

395 **Antibodies (for neutrophil depletion study):** Anti-Ly6G monoclonal antibody clone  
396 RB6-8C5 (Cat. No MA1-10401 from Invitrogen, Mouse (G3A1) mAb IgG1 Isotype Control  
397 #5415 (Cell Signaling Technologies).

398 **Antibodies (for IHC and Western blotting):** Anti-Ly6G antibody clone RB6-8C5 for  
399 IHC (#ab25377 from Abcam); anti-FPR1 (Cat. No. NB100-56473 from NOVUS Biological);  
400 anti- PLCY1 (Cat. No. cs2822 from Cell Signaling), GAPDH Antibody Rabbit Polyclonal, Cat.  
401 No. 10494-1-AP (Proteintech Cat. No. 1094-I-AP); and CCR1 Polyclonal antibody (Abnova Cat.  
402 No. PAB0176). Anti- $\alpha$ -SMA antibody (Cat. No. ab5694) and anti-vimentin antibody (Cat. No.  
403 ab92547) from Abcam.

404 **Antibodies (for flow cytometry):** Mouse CCR1 Alexa Fluor® 488-conjugated Antibody  
405 #FAB5986G-100UG (R & D Systems); Alexa Fluor® 700 anti-mouse NK-1.1 Antibody

406 #108729 (BioLegend); Alexa Fluor® 700 anti-mouse CD3ε Antibody #152315 (BioLegend);  
407 Alexa Fluor® 700 anti-mouse CD19 Antibody #115527 (BioLegend); BV605 Hamster Anti-  
408 Mouse CD11c Clone HL3 (RUO) #563057 (BD Biosciences); LIVE/DEAD™ Fixable Aqua  
409 Dead Cell Stain Kit, for 405 nm excitation #L34966 (ThermoFisher Scientific); F4/80 antibody |  
410 Cl:A3-1 #MCA497PBT (Bio-Rad); BV650 Hamster Anti-Mouse CD11c Clone HL3 (RUO)  
411 #564079 (BD Biosciences); BV711 Rat Anti-Mouse CD45 Clone 30-F11 (RUO) #563709 (BD  
412 Biosciences); NK1.1 Monoclonal Antibody (PK136), PE, eBioscience™ #12-5941-82  
413 (ThermoFisher Scientific); CD19 Monoclonal Antibody (eBio1D3 (1D3)), PE, eBioscience™  
414 #12-0193-82 (ThermoFisher Scientific); CD3e Monoclonal Antibody (145-2C11), PE,  
415 eBioscience™ #12-0031-82 (ThermoFisher Scientific); FPR1 Polyclonal Antibody #PA1-41398  
416 (ThermoFisher Scientific); Goat anti-Rabbit IgG (H+L) Highly Cross-Adsorbed Secondary  
417 Antibody, Alexa Fluor 594 #A-11037 (ThermoFisher Scientific); Ly6G Monoclonal Antibody  
418 (1A8-Ly6g), PE-Cyanine7, eBioscience™ #25-9668-82 (ThermoFisher Scientific), PerCP Cy5.5  
419 CD45 (BD Biosciences, Cat. 550994); APC Gr1, PE CD11b (BD Biosciences, Cat 553129);  
420 FITC CD69 (BD Biosciences, Cat #: 557392); and PECy7 F4/80 (Biolegends, Cat 123114).

421

422 **Reagents:** Hematoxylin & Eosin Staining (Richard Allan Scientific Hematoxylin, Eosin  
423 Y, and Bluing Reagent Cat. Numbers: 7111L, 7211L, and 7301L from Thermo Fisher;  
424 Myeloperoxidase (MPO) Mouse ELISA Kit; cAMP measurement by ELISA (Cyclic AMP  
425 Competitive ELISA Kit); CCL3 (recombinant mouse CCL3/MIP-1α protein; 450-MA,  
426 rhCCL3/MIP-1α isoform LD78a; 270-LD from R&D); N-formyl-Met-Leu-Phe (fMLF), Cat. No.  
427 59880-97-6 from Sigma; Collagenase D (CAS No. 9001-12-1 from Sigma Aldrich); Masson's  
428 Trichrome (Trichrome Stain Connective Tissue Stain; Cat. No. ab150686 from Abcam). EasySep  
429 Human neutrophil Enrichment Kit, EasySep Mouse neutrophil Enrichment Kit, EasySep Buffer

430 (Cat. No. 19762, 19666, and 20144 from STEMCELL Technologies), and Calcein AM (Cat no.  
431 C1430 from ThermoFischer).

432

433 **Statistical analysis:** Statistical analyses were performed using GraphPad Prism 6.0 as we  
434 described previously (81, 82). Comparisons between two groups were performed using Student's  
435 *t*-test. Comparisons between more than two groups were performed using one-way analysis of  
436 variance (one-way ANOVA). To account for error inflation due to multiple testing, the  
437 Bonferroni method was used. Data are presented as Mean  $\pm$  SEM. Statistical significance  
438 threshold was set at  $P$ -values  $\leq 0.05$ .

439

440           **Acknowledgments:** We are thankful to Dr. Lena Al-Harhi and Dr. Celeste Napier for  
441 the use their equipment. We also would like to thank Mr. Jeffrey Martinson for his help with the  
442 flow cytometry and the rest of Shafikhani lab for their valued opinions on these studies. This  
443 work was supported by the National Institutes of Health (NIH) grant RO1DK107713 to (S.H.S.),  
444 R01AI150668 to (S.H.S.), F31DK118797 to (J.Z.), and the NIH PhD institutional training grant  
445 GM109421.

446

447           **Competing interests:** Rush University Medical Center has filed a patent (International  
448 Application Number: PCT/US19/41112). Dr. Sasha Shafikhani is the listed inventor on this  
449 application.

450

451           **Author contributions:** S. H. S. conceived and coordinated all aspects of the studies and  
452 wrote the paper. R.R & J.Z. conducted and contributed to all the figures in this MS and wrote the  
453 paper. S.J.W. contributed to Figure 2. M.F.M. contributed to animal studies. A.Z., R.E., & E.F.G.  
454 contributed to the flow cytometry data in all figures. T.K. and J.R. contributed to the data  
455 analyses, research design, and reagents. All authors had the opportunity to review and edit the  
456 manuscript. All authors approved the final version of the manuscript.

457

458

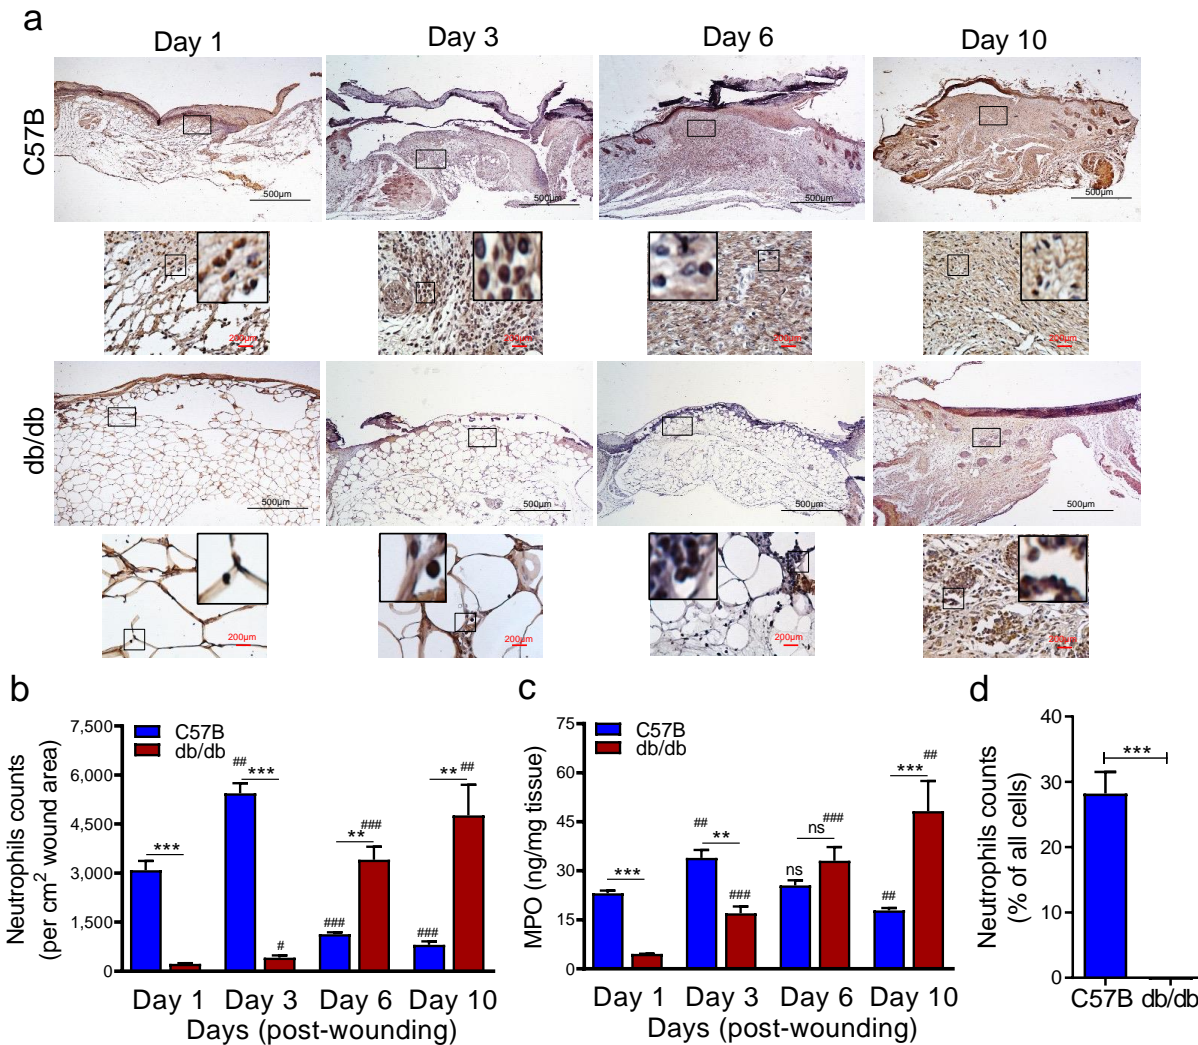

459

460

461 **Fig. 1. Neutrophil response is delayed in infected diabetic wound tissue.** (a) Normal (C57B)  
 462 and diabetic (db/db) wounds were infected with PA103 ( $10^3$  CFU). Wound tissues were  
 463 harvested at indicated timepoints post-infection and assessed for neutrophil contents either by  
 464 histological analysis using anti-Ly6G antibody (a-b), or by assessing MPO levels by ELISA (c).  
 465 Representative regions from underneath the wounds extending in the dermis are shown at 40X  
 466 and 400X magnification (top and bottom, respectively). A representative magnified region is also  
 467 inserted in the 400X magnification images. Black scale bar = 500 $\mu$ m for 40x magnification and  
 468 red scale bar = 200 $\mu$ m for 400x magnification. (d) Day 1 infected wound tissues of C57B and  
 469 db/db were evaluated for their neutrophil response by flow cytometry. Corresponding data were  
 470 plotted as the Mean  $\pm$  SEM. (N=4; ns = not significant, \* $p$ <0.05; \*\* $p$ <0.01; \*\*\* $p$ <0.001 – are  
 471 comparisons made between C57B and db/db at indicated timepoints; or # $p$ <0.05; ## $p$ <0.01;  
 472 ### $p$ <0.001 are comparisons made within each group to day 1 values respectively. Statistical  
 473 analyses between groups were conducted by One-way ANOVA with additional post hoc testing,  
 474 and pair-wise comparisons between groups were performed or by unpaired Student's  $t$ -test).

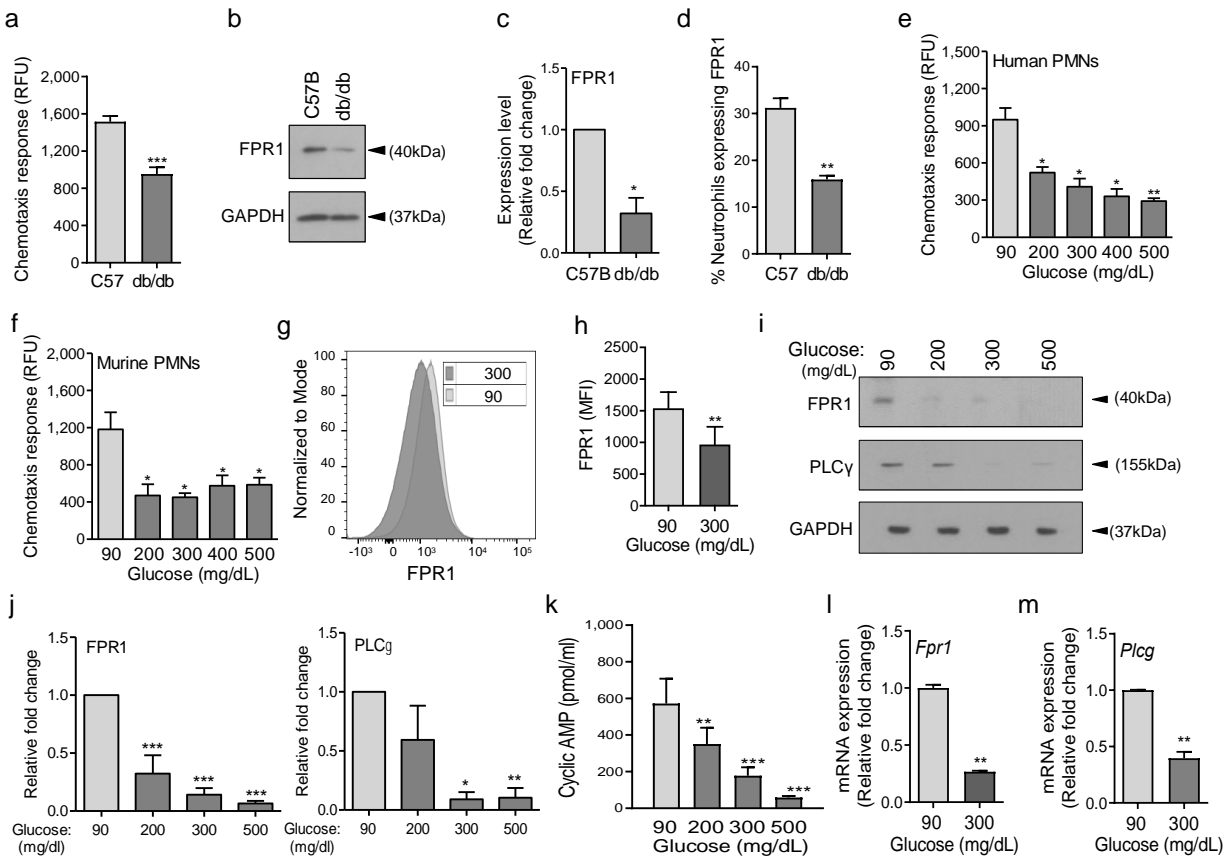

475

476

477

478

479

480

481

482

483

484

485

486

487

488

489

490

491

492

493

494

495

496

497

498

**Fig. 2. Chemotactic response is impaired in diabetic neutrophils through FPR1 chemokine receptor.** (a-b) Neutrophils were extracted from the peripheral blood of C57B and db/db animals to assess their ability to chemotax toward 100nM fMLP (a), or for the expression of FPR1 by Western blotting (b). (c) Densitometry values associated with (b) are plotted as Mean ± SEM (N=4 mice/group). (d) Equal number of neutrophils (extracted from Day 1 C57B and db/db wounds) were assessed by for the expression of FPR1 on neutrophils by flow cytometry (N=4 mice/group). (e-f) Purified neutrophils from C57B bone marrow (e), or peripheral blood of non-diabetic individuals (f), were exposed to media containing glucose in normal (90 mg/dl) or diabetic range (200-500 mg/dl) for 1h to assess their ability to chemotax toward 100nM fMLP (N≥3 mice/group). (g-m) Neutrophils from C57B bone marrow were exposed to glucose in normal level (90 mg/dl) or in diabetic range (300 mg/dl) for 1h and assessed: for surface expression of FPR1 by flow cytometry (g-h); for the expression of FPR1 and PLCγ by Western blotting (i) with corresponding densitometry values being plotted as Mean ± SEM (N=4 mice/group) in (j-i); or for mRNA expression analyses of FPR1 and PLCγ by RT-PCR in (l-m) (Data were plotted as the Mean ± SEM; N=2, each experiment repeated at least twice; ns = not significant, \*p<0.05, \*\*p<0.01, \*\*\*p<0.001; Student's *t*-test); and for c-AMP levels in (m) (Data were plotted as the Mean ± SEM. (N≥3 mice/group, ns = not significant, \*p<0.05, \*\*p<0.01, \*\*\*p<0.001. Comparisons were made to the normal glucose level. Statistical analyses between groups were conducted by One-way ANOVA with additional post hoc testing, and pair-wise comparisons between groups were performed or by unpaired Student's *t*-test).

499

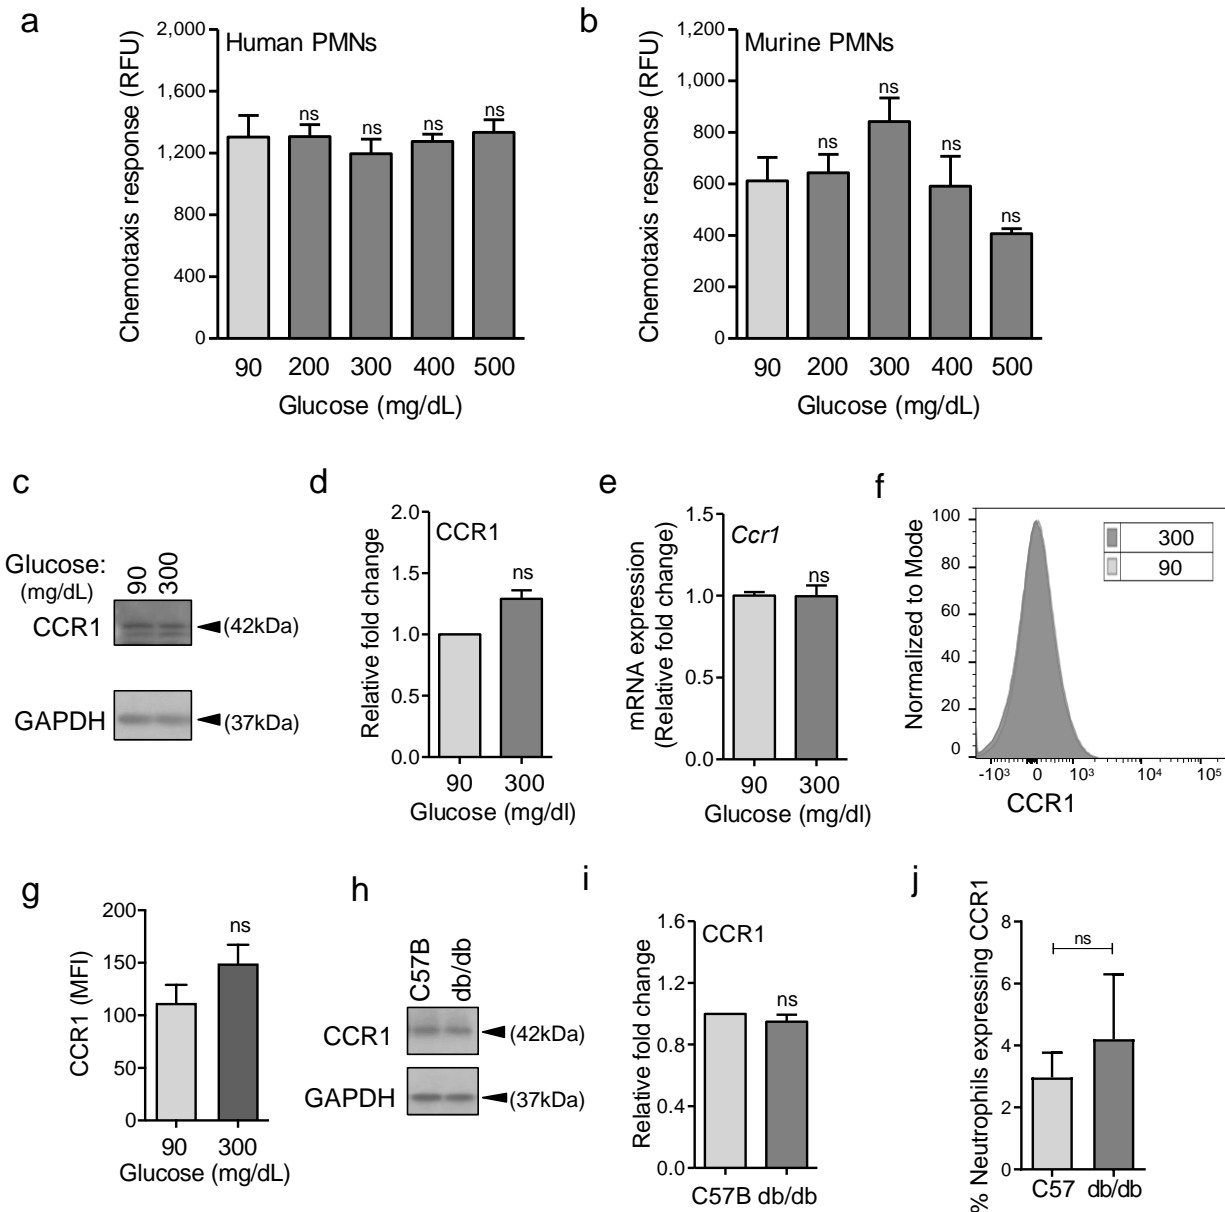

500  
501

**Fig 3. CCR1 receptor remains functional under diabetic conditions.** Human (a) or mouse (b) neutrophils were examined for their chemotactic responses toward CCL3 (5ng/ml) after 1h exposure to glucose in normal (90 mg/dl) or diabetic range (200-500 mg/dl). (c-g) Neutrophils extracted from bone marrow of C57B were exposed to normal glucose (90 mg/dl) or high glucose (300 mg/dl) for 1h and assessed for CCR1 expression by Western blotting (c-d); for mRNA transcription analysis by RT-PCR (e); and for CCR1 surface expression (f-g). (h-i) Neutrophils were purified from peripheral blood of normal (C57B) or diabetic (db/db) mice and assessed for the expression of CCR1 by Western blotting (h) and their respective densitometry values were plotted as the Mean  $\pm$  SEM and shown in (i). (j) Equal number of neutrophils (extracted from Day 1 C57B and db/db wounds) were assessed for the expression of CCR1 on neutrophils by flow cytometry (N=4; ns = not significant, \*p<0.05, \*\*p<0.01, \*\*\*p<0.001. Statistical analyses between groups were conducted by One-way ANOVA with additional post hoc testing, and pair-wise comparisons between groups were performed or by unpaired Student's *t*-test).



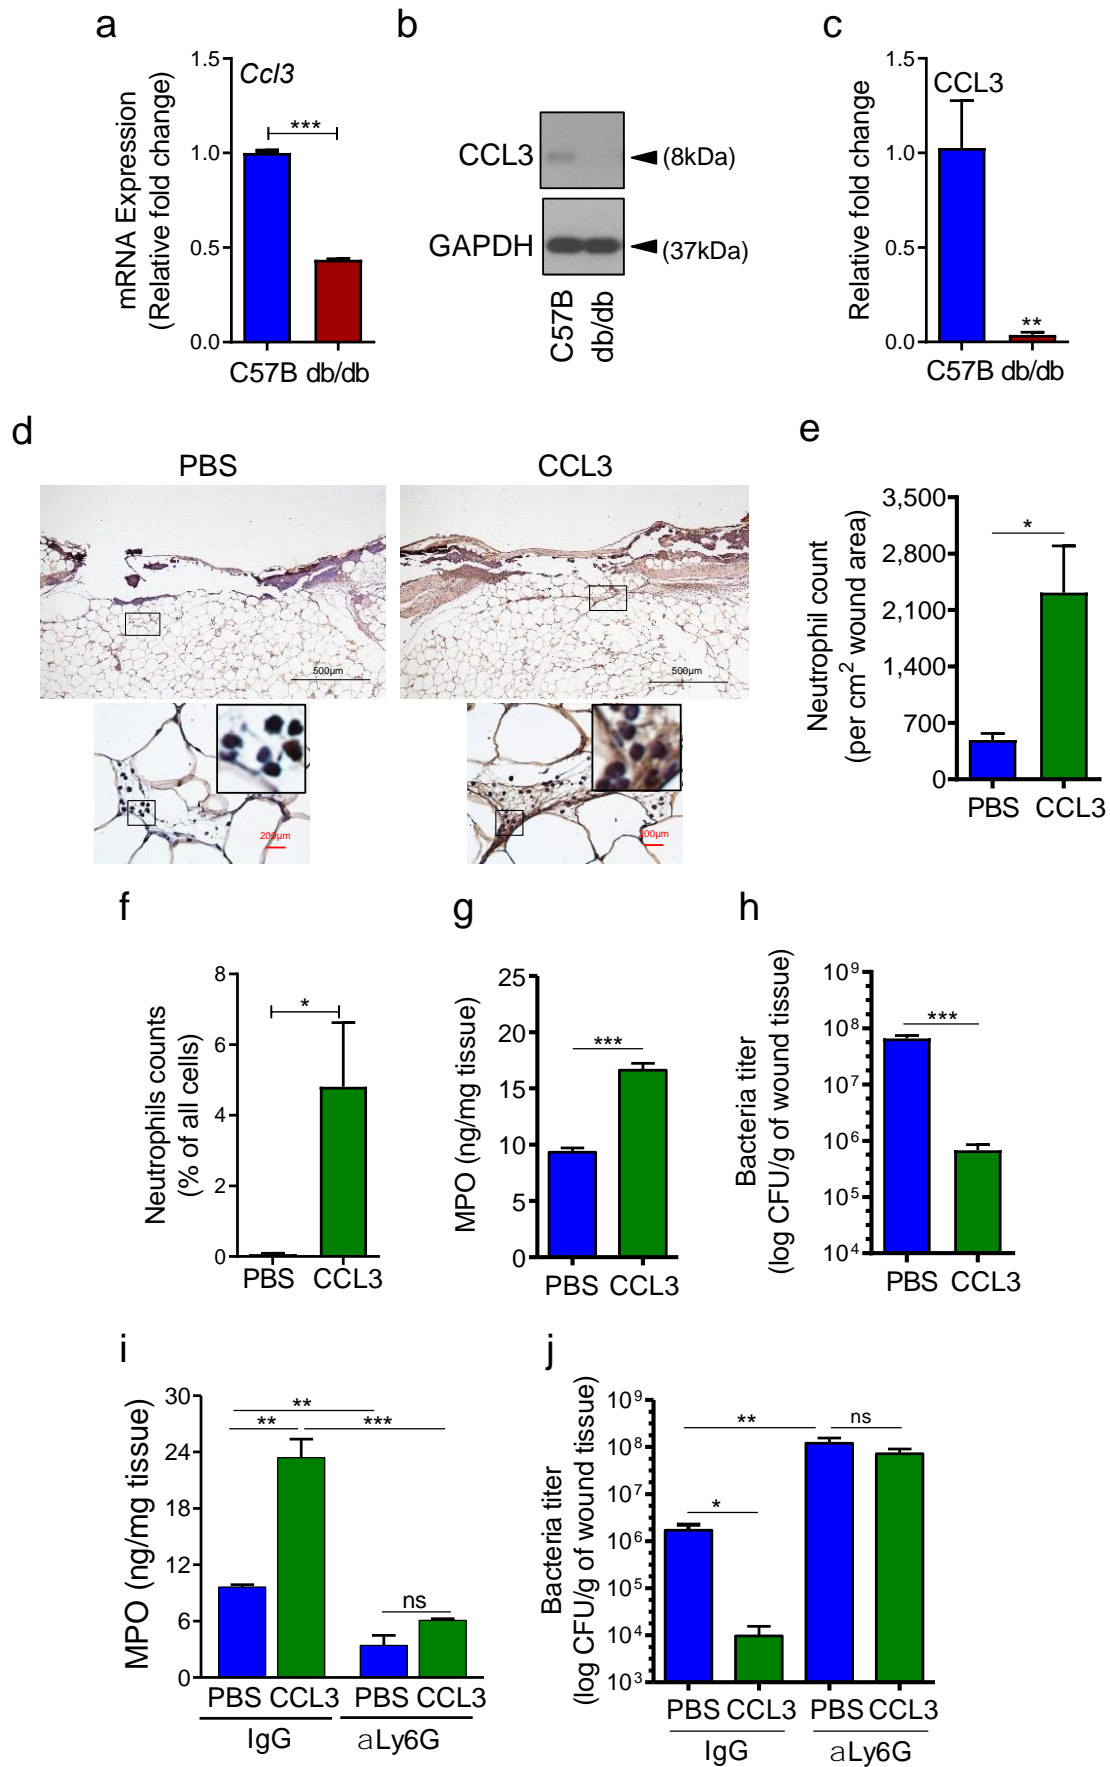

516

517 **Fig 4. CCL3 topical treatment enhances neutrophil response and infection control in**  
518 **diabetic wound. (a-c)** Day 1 wound tissues of C57B and db/db were harvested and assessed for  
519 the CCL3 mRNA levels by RT-PCR **(a)** and by Western blotting **(b-c)**, and the data were plotted  
520 as the Mean  $\pm$  SEM ( $N \geq 4$  mice/group), after normalization to 18S and GAPDH respectively, to  
521 account for reduced leukocytes in day 1 diabetic wounds. **(d-e)** db/db diabetic wounds were  
522 treated with either PBS or CCL3 (1 $\mu$ g/wound) and infected with PA103. 24h post-infection,  
523 wounds were collected and assessed for their neutrophil contents by histological analysis using a-  
524 Ly6G antibody. **(d)** Representative wound images at 40X and 400X magnification (top and  
525 bottom, respectively) are shown. Inserts are representative magnified regions within the 400X  
526 magnification images. Black scale bar = 500 $\mu$ m for 40x magnification and red scale bar = 200 $\mu$ m  
527 for 400X magnification. **(e)** Data are shown as Mean  $\pm$  SEM ( $N \geq 4$  mice/group,  $\geq 9$  random  
528 fields/wound/mouse). **(f)** Flow cytometry data showing increased neutrophil response in CCL3-  
529 treated Day 1 db/db infected wounds. **(g)** Neutrophil response was assessed for neutrophil marker  
530 MPO by ELISA. **(h-i)** db/db mice received either a-Ly6G (100 $\mu$ g/mouse) to cause neutrophil  
531 depletion or an IgG isoform as control, by intraperitoneal (i.p.) injection. 24h after injection, IgG  
532 or a-Ly6G-treated animals were wounded and treated with either PBS or CCL3 and infected with  
533 PA103. The impact of neutrophil depletion on the ability of CCL3 treatment to boost infection  
534 control in diabetic wound was assessed by MPO analysis **(i)** and CFU count determination **(j)** in  
535 day 1 wounds. Data were plotted as Mean  $\pm$  SEM ( $N \geq 4$  mice/group). (For all panels; ns = not  
536 significant, \* $p < 0.05$ ; \*\* $p < 0.01$ , \*\*\* $p < 0.001$ . Statistical analyses between groups were conducted  
537 by One-way ANOVA with additional post hoc testing, and pair-wise comparisons between groups  
538 were performed or by unpaired Student's *t*-test).

539

540

541

542

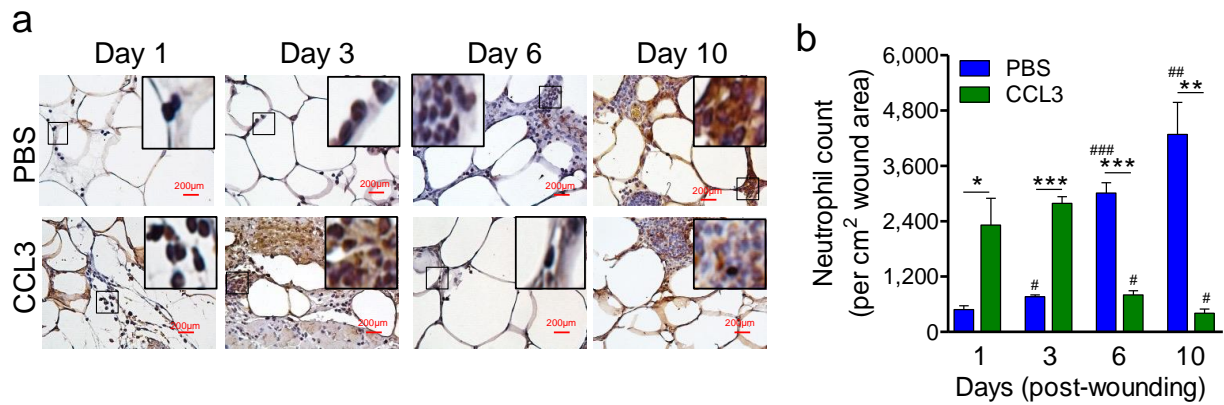

543

544 **Fig. 5. Treatment with CCL3 does not lead to persistent inflammation in infected diabetic**  
545 **wounds.** db/db wounds were treated with PBS or CCL3 (1µg/wound) and infected with PA103  
546 (1000 CFU). Wound tissues were collected at indicated timepoints and assessed for their  
547 neutrophils contents by histological analysis using neutrophil marker Ly6G staining.  
548 Representative images of regions from underneath the wounds extending in the dermis at 400X  
549 magnification are shown in (a). Representative magnified regions are inserted in the images. Red  
550 scale bars = 200µm. (Representative full wound images of these staining can be found in Fig. S7  
551 and Fig. 6c). The corresponding data are plotted as the Mean ± SEM and are shown in (b). (N<sub>≥</sub>3  
552 mice/group; ns = not significant; \*p<0.05, \*\*p<0.01, \*\*\*p<0.001, #p<0.05, ##p<0.01, ###p<0.001.  
553 Statistical analyses between groups were conducted by One-way ANOVA with additional post  
554 hoc testing, and pair-wise comparisons between groups were performed or by unpaired Student's  
555 *t*-test. (\*) denotes significance between groups while (#) indicates significance within the same  
556 group in comparison to day 1 of respective wound groups).  
557

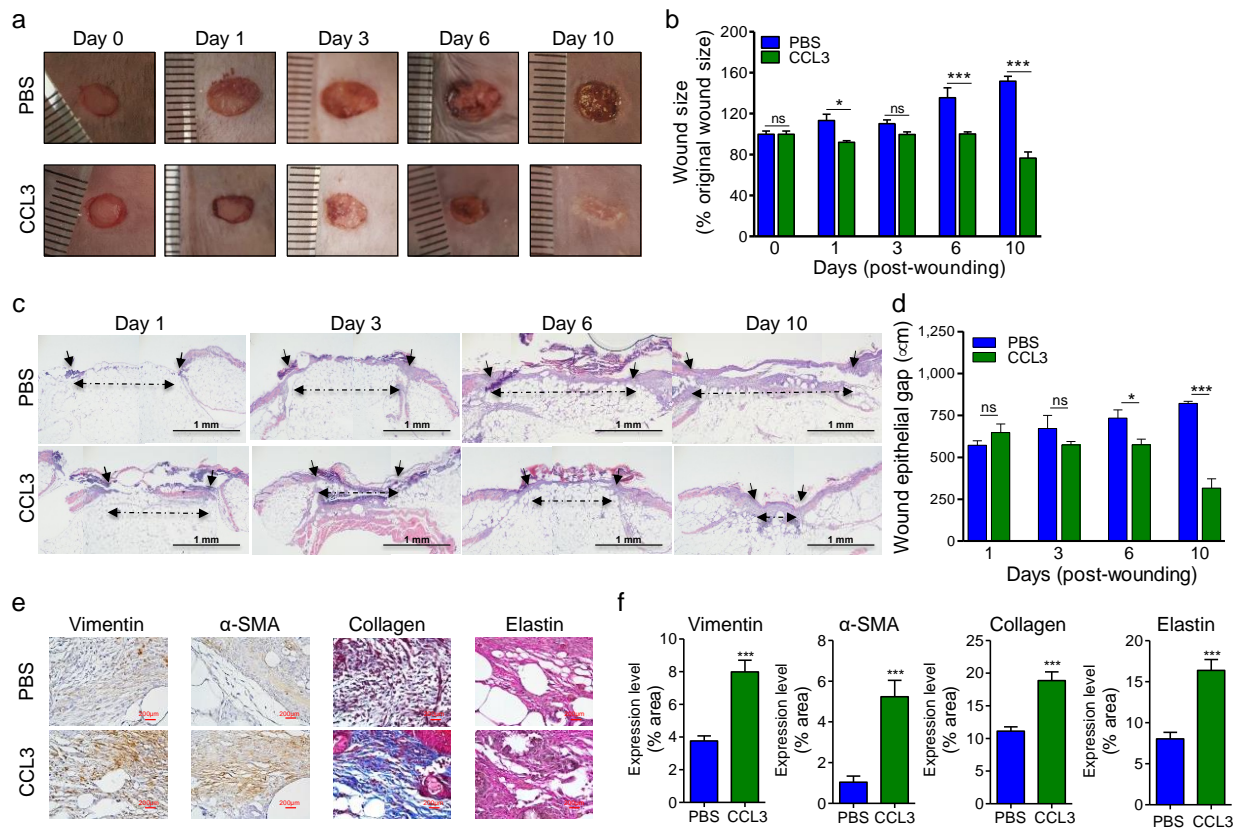

558

559

560 **Fig 6. Treatment with CCL3 stimulates healing in infected diabetic wounds.** (a-d) db/db  
 561 wounds were either treated with PBS or CCL3 and infected with PA103 (1000 CFU). Wound  
 562 healing was assessed at indicated timepoints by digital photography (a) or by H&E histological  
 563 analysis of re-epithelization (c). Representative regions from underneath the wounds extending  
 564 in the dermis are shown at 40X magnification are shown in (c). (Black scale bar = 1mm, and the  
 565 wound gap is shown by dotted line). The corresponding data for (a & c) are shown in (b & d) as  
 566 the Mean ± SEM. (N≥4 mice/group, ≥9 random fields/wound/mouse; ns = not significant;  
 567 \*p<0.05, \*\*p<0.01, \*\*\*p<0.001, Student's *t*-test). (e-f) Day 10 db/db wounds (treated with either  
 568 PBS or CCL3 and infected with PA103) were assessed for fibroblast, myofibroblast, elastin and  
 569 cartilage healing markers by vimentin, α-SMA, Masson's Trichrome, and elastin staining  
 570 respectively. (e) Representative regions from underneath the wounds extending in the dermis  
 571 are shown at 400X magnification. (Red scale bar=200µm. For the corresponding full wound images  
 572 at 40X magnification, see Fig. S8). (f) The corresponding data are plotted as the Mean ± SEM.  
 573 (N=4 mice/group, ≥9 random fields/wound/mouse; \*\*\*p<0.001. Statistical analyses between  
 574 groups were conducted by One-way ANOVA with additional post hoc testing, and pair-wise  
 575 comparisons between groups were performed or by unpaired Student's *t*-test).

576

577

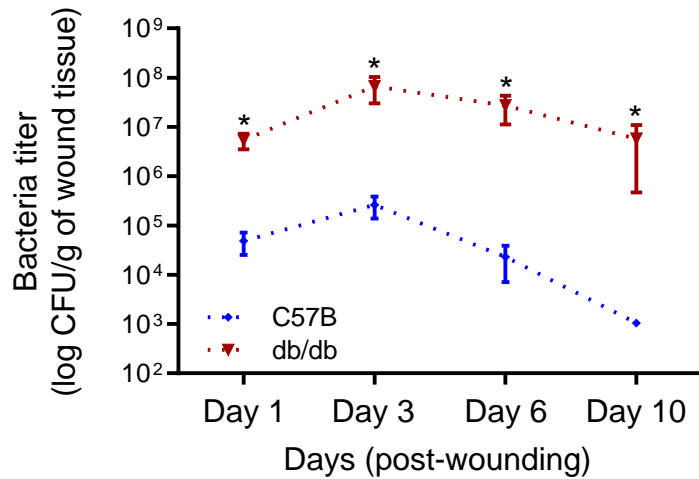

578

579

580 **Fig. S1. Diabetic wound is vulnerable to increased infection with *Pseudomonas aeruginosa*.**

581 Normal and diabetic wounds were infected with 10<sup>3</sup> of *P. aeruginosa* (PA103). Bacterial burden  
582 in wounds was determined by serial dilution and plating at indicated times after infection and is  
583 shown as the Mean ± SEM. (N=8; 4 mice/group, 2 wounds/mouse; (\*) Represents significance  
584 with p<0.01. Statistical analyses between groups were conducted by One-way ANOVA with  
585 additional post hoc testing, and pair-wise comparisons between groups were performed or by  
586 unpaired Student's *t*-test).

587

588

589

590

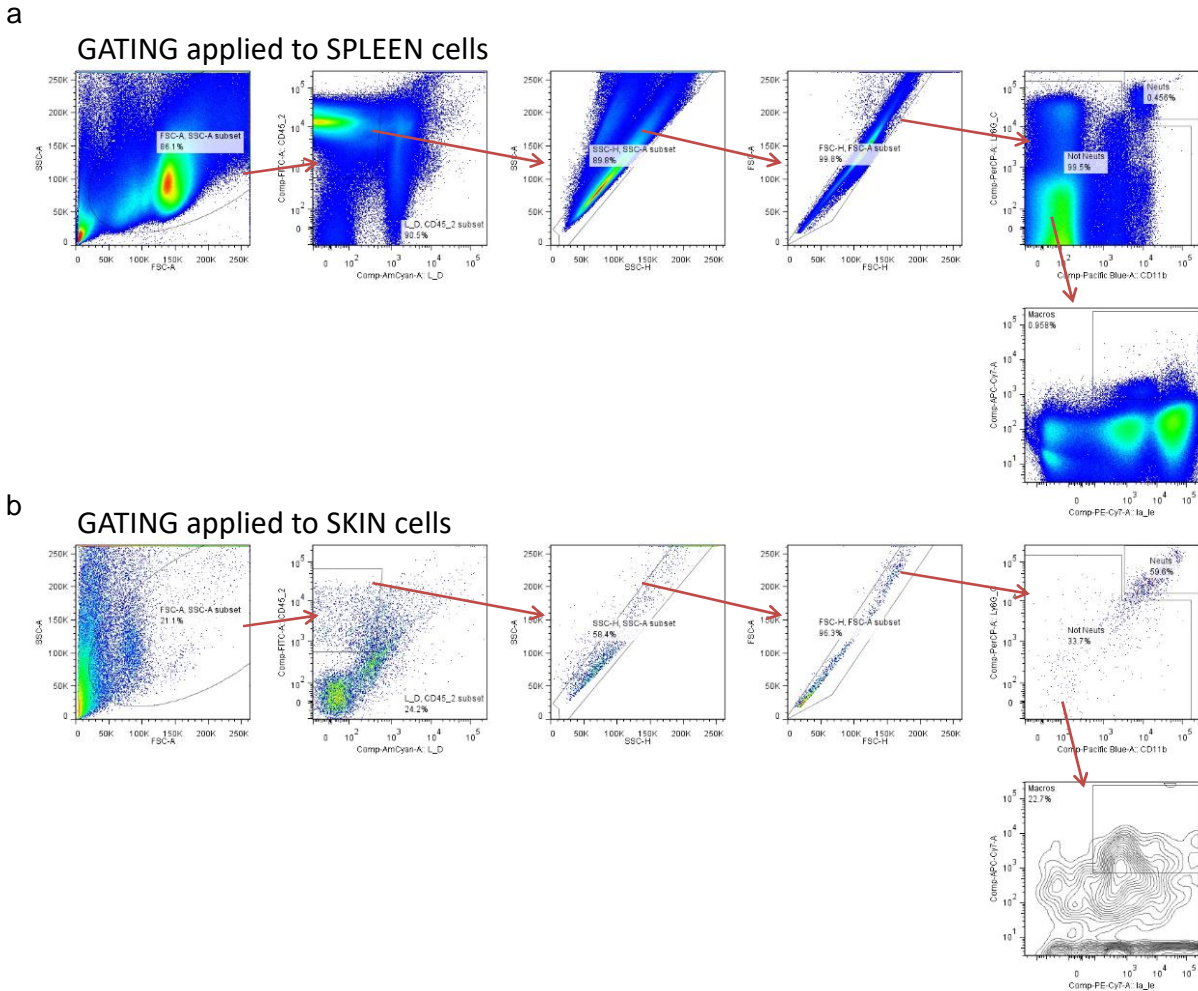

591

592 **Fig. S2. Gating strategy for flow cytometric analysis.** Spleen **(a)** and skin tissues **(b)** were  
 593 harvested from C57B mice. For the gating strategy, Live singlet lymphocytes were identified by  
 594 gating on forward scatter (FSC)-area (A) versus (vs) side scatter (SSC)-A, then LIVE/DEAD  
 595 staining vs SSC-A, FSC-A vs FSC-height (H), SSC-A vs SSC-H, FSC-width (W) vs SSC-W, and  
 596 CD45 vs SSC-A. T cells, B cells, and NK cells were excluded using antibodies against CD3,  
 597 CD19, and NK1.1, respectively, all on one channel as a dump gate. Neutrophils were then  
 598 identified using CD11b vs Ly6G staining, with neutrophils being CD11b high and Ly6G high.  
 599 Macrophages were identified as CD11b positive and Ly6G low/negative, followed by F4/80  
 600 positive staining.

601

602

603

604

605

606

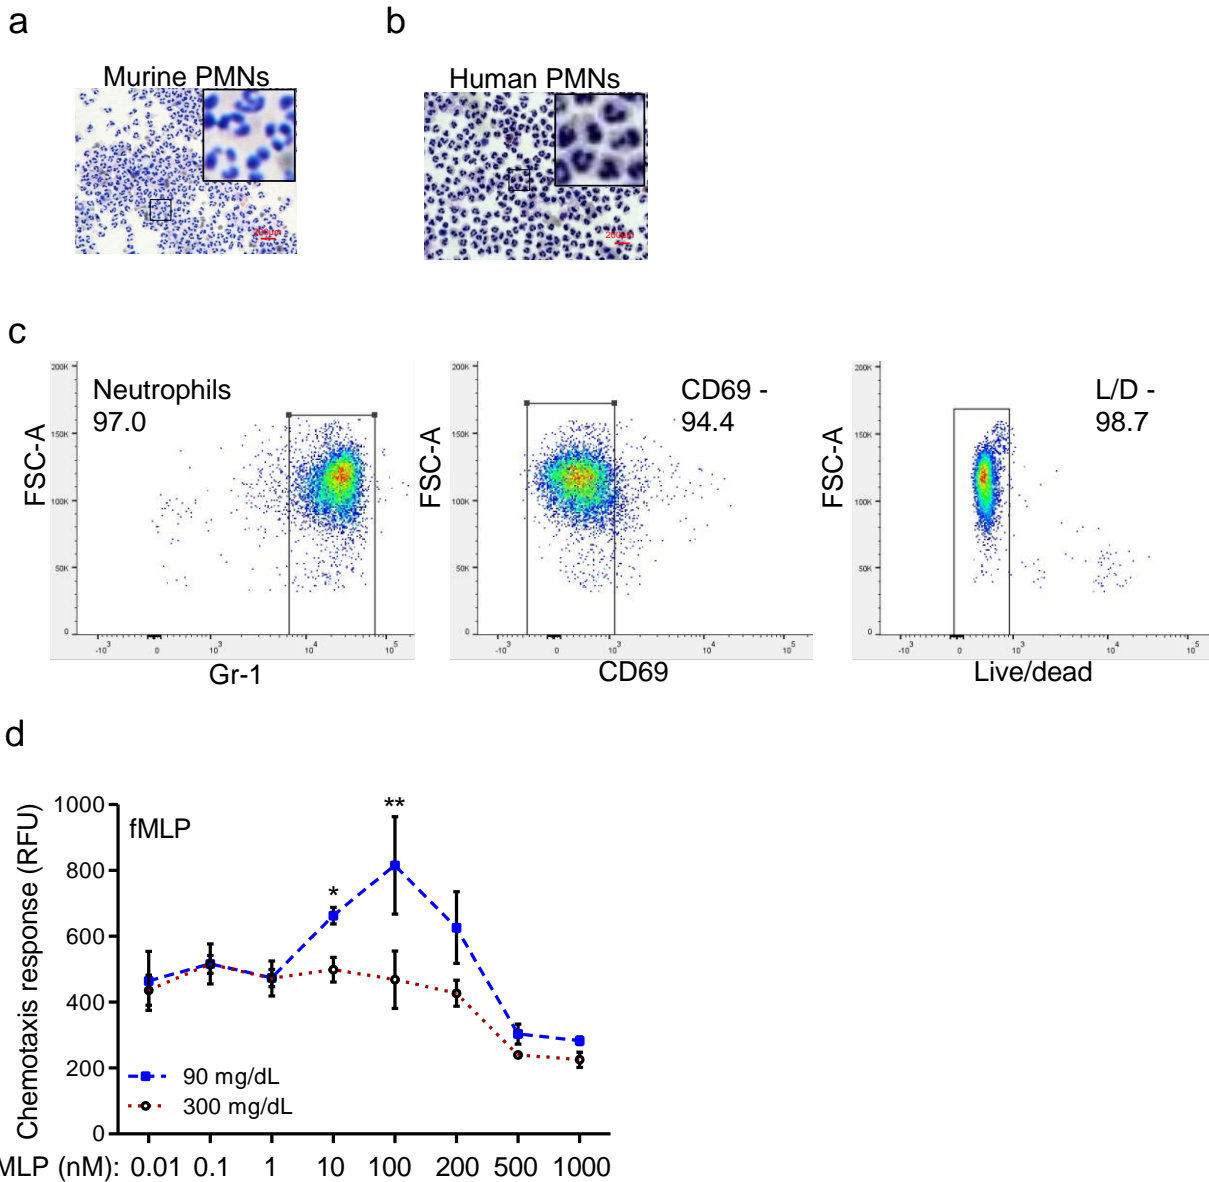

607

608

609 **Fig. S3. Chemotactic response is impaired in diabetic neutrophils through FPR1 primary**  
610 **receptor. (a-b)** Neutrophils (PMNs) were purified from murine (C57B bone marrow) and human  
611 peripheral blood, as discussed in Materials and Methods. Representative images of mouse and  
612 human purified neutrophils are shown at indicated magnification. Magnified representative  
613 regions are shown inserts within each image. (Red scale bars are 200 $\mu$ m). (c) Representative  
614 flow histograms of purified mouse neutrophils showing that these neutrophils are over 97%  
615 pure, live, and naïve, as assessed by indicated markers. (d) Chemotaxis of purified mouse  
616 PMNs towards varying concentrations of fMLP after 1h exposure to normal glucose (90 mg/dl)  
617 or high glucose in diabetic range (300 mg/dl). Data are plotted as the Mean  $\pm$  SEM. (N=4 mice/group; ns  
618 = not significant; \* $p$ <0.05, \*\* $p$ <0.01, \*\*\* $p$ <0.001. Statistical analyses between groups were

619 conducted by One-way ANOVA with additional post hoc testing, and pair-wise comparisons  
620 between groups were performed or by unpaired Student's *t*-test).  
621

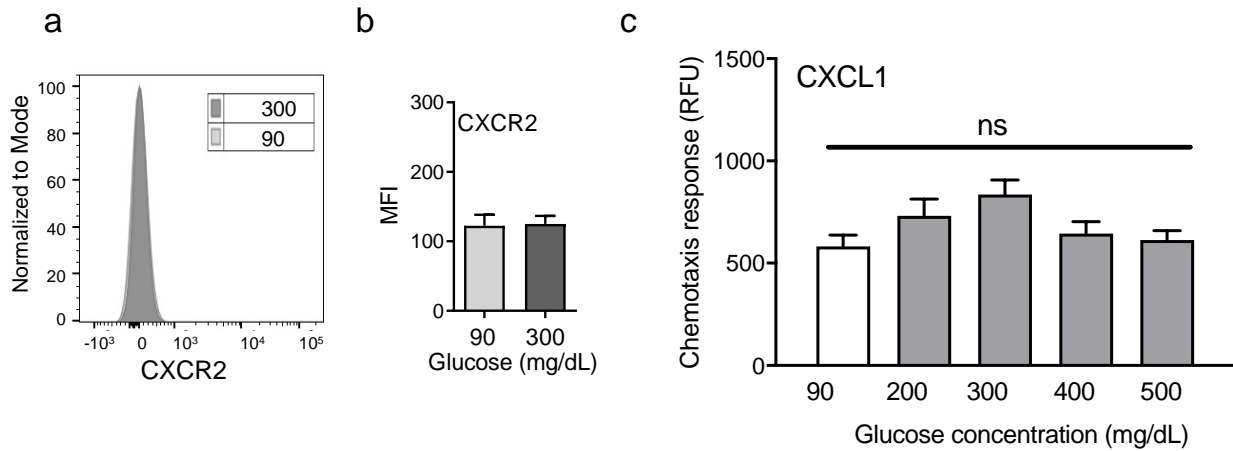

622

623

624

625 **Fig. S4. Exposure to high glucose does not affect CXCR2 auxiliary chemokine receptor. (a-**  
626 **b)** Mouse neutrophils were exposed to glucose at indicated concentrations for 1h and evaluated  
627 for their surface expression of CXCR2 by flow cytometry. A representative histogram is shown  
628 in **(a)** and the corresponding data are plotted as the Mean  $\pm$  SEM is shown in **(b)**. (N=4). **(c)**  
629 Murine neutrophils were examined for their chemotactic response toward CXCL1 (5ng/ml) and  
630 after 1h exposure to normal glucose (90 mg/dl) and high glucose in diabetic range (200-500  
631 mg/dl). Data were plotted as Mean  $\pm$  SEM. (N=6; ns = not significant).  
632

633



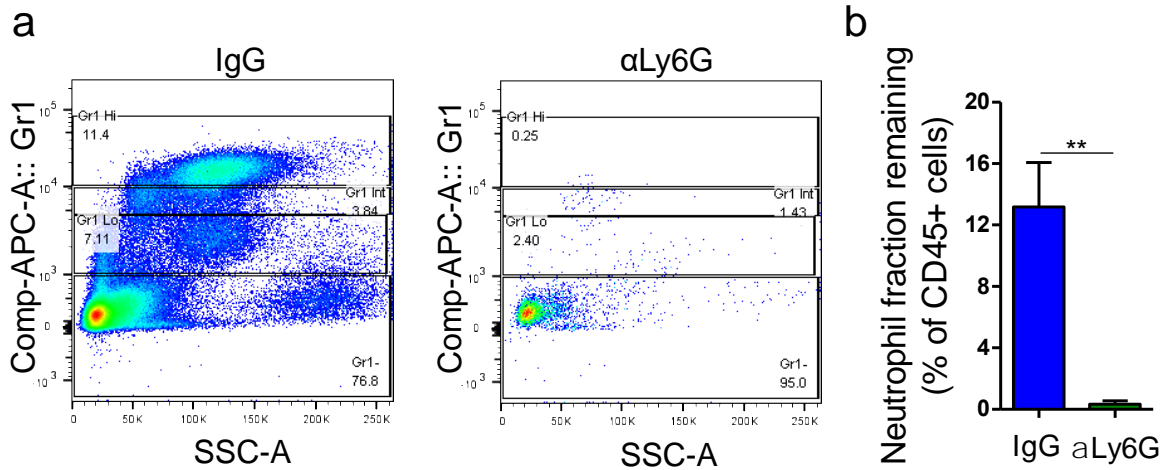

634

635

636 **Fig. S5. Supplementary data associated with Fig. 4.** db/db mice were injected by i.p with anti-  
637 Ly6G or IgG isoform. 24h after injection, their peripheral bloods were examined for their  
638 neutrophil contents by flowcytometry. Representative histograms of neutrophil depletion are  
639 shown in (a) and the corresponding data plotted as the Mean  $\pm$  SEM is shown in (b). (N=4;  
640 \*\*p<0.01. Student's *t*-test).

641

642

643

644

645

646

647

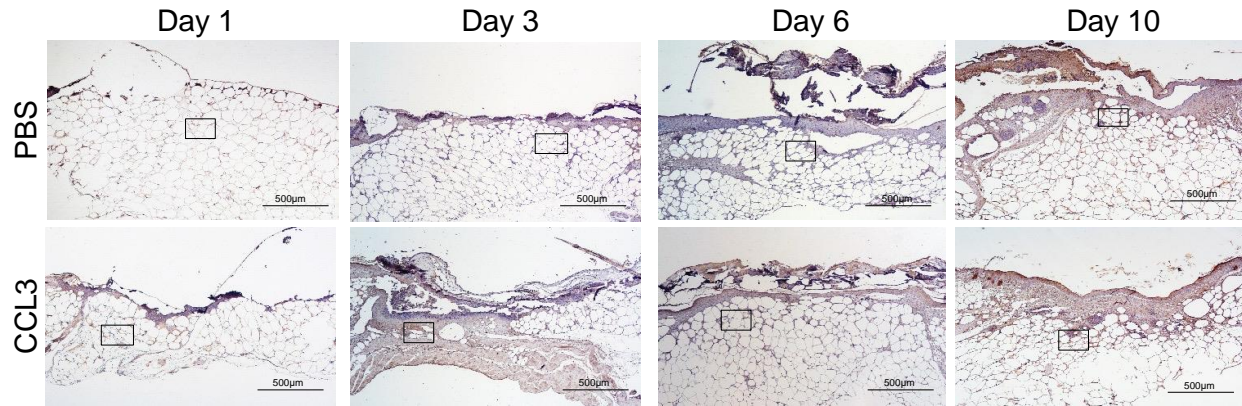

648

649

650

651 **Fig. S6. Full wound images associated with Fig. 5c.** db/db animals were wounded and treated

652 with either CCL3 or PBS prior to infection with PA103 ( $10^3$  CFU). 24h after treatment and

653 infection, wound tissues were harvested and stained with neutrophil marker Ly6G.

654 Representative low magnification (40X) images of full wounds are shown. Inserted rectangles

655 show the cropped regions represented in Fig 5c. (Black scale bar = 500µm).

656

657

658

659

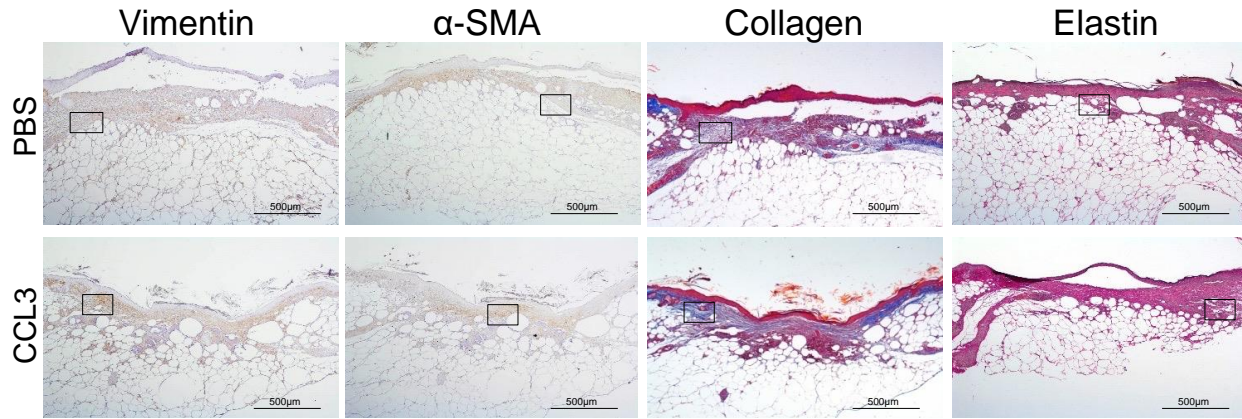

660

661

662 **Fig. S7. Full wound images associated with Fig. 6e.** db/db animals were wounded and treated  
663 with either CCL3 or PBS prior to infection with PA103 ( $10^3$  CFU). 10 days after treatment and  
664 infection (Day 10), wound tissues were harvested and assessed for fibroblast, myofibroblast,  
665 elastin and cartilage healing markers by vimentin, α-SMA, Masson's Trichrome and elastin  
666 staining respectively. Representative 40X magnification images of the full wounds are shown,  
667 and the high magnification images and the tabulated data are presented in Fig. 6e-f. (Black scale  
668 bar = 500µm. Inserted rectangles show the cropped regions represented in Fig. 6e).

669

670

671

## 672 References:

- 673 1. C. K. Sen *et al.*, Human skin wounds: a major and snowballing threat to public health and the economy. *Wound repair and regeneration : official publication of the Wound Healing Society [and] the European*  
674 *Tissue Repair Society* **17**, 763-771 (2009).  
675
- 676 2. H. Brem, M. Tomic-Canic, Cellular and molecular basis of wound healing in diabetes. *The Journal of*  
677 *clinical investigation* **117**, 1219-1222 (2007).
- 678 3. G. E. Reiber *et al.*, Causal pathways for incident lower-extremity ulcers in patients with diabetes from two  
679 settings. *Diabetes Care* **22**, 157-162 (1999).
- 680 4. R. G. Frykberg, Diabetic foot ulcers: pathogenesis and management. *Am Fam Physician* **66**, 1655-1662  
681 (2002).
- 682 5. A. J. Boulton, The diabetic foot: a global view. *Diabetes Metab Res Rev* **16 Suppl 1**, S2-5 (2000).
- 683 6. K. Kirketerp-Moller *et al.*, Distribution, organization, and ecology of bacteria in chronic wounds. *J Clin*  
684 *Microbiol* **46**, 2717-2722 (2008).
- 685 7. K. Gjodsboel *et al.*, Multiple bacterial species reside in chronic wounds: a longitudinal study. *Int Wound J* **3**,  
686 225-231 (2006).
- 687 8. S. E. Dowd *et al.*, Survey of bacterial diversity in chronic wounds using pyrosequencing, DGGE, and full  
688 ribosome shotgun sequencing. *BMC Microbiol* **8**, 43 (2008).
- 689 9. H. Redel *et al.*, Quantitation and composition of cutaneous microbiota in diabetic and nondiabetic men. *The*  
690 *Journal of infectious diseases* **207**, 1105-1114 (2013).
- 691 10. J. Goldufsky *et al.*, *Pseudomonas aeruginosa* uses T3SS to inhibit diabetic wound healing. *Wound repair*  
692 *and regeneration : official publication of the Wound Healing Society [and] the European Tissue Repair*  
693 *Society* **23**, 557-564 (2015).
- 694 11. P. Martin, S. J. Leibovich, Inflammatory cells during wound repair: the good, the bad and the ugly. *Trends*  
695 *in cell biology* **15**, 599-607 (2005).
- 696 12. M.-H. Kim *et al.*, Dynamics of neutrophil infiltration during cutaneous wound healing and infection using  
697 fluorescence imaging. *Journal of Investigative Dermatology* **128**, 1812-1820 (2008).
- 698 13. J. V. Dovi, A. M. Szpaderska, L. A. DiPietro, Neutrophil function in the healing wound: adding insult to  
699 injury? *Thromb Haemost* **92**, 275-280 (2004).
- 700 14. V. Brinkmann *et al.*, Neutrophil extracellular traps kill bacteria. *Science* **303**, 1532-1535 (2004).
- 701 15. T. Velnar, T. Bailey, V. Smrkolj, The wound healing process: an overview of the cellular and molecular  
702 mechanisms. *J Int Med Res* **37**, 1528-1542 (2009).
- 703 16. G. Fenteany, P. A. Janmey, T. P. Stossel, Signaling pathways and cell mechanics involved in wound  
704 closure by epithelial cell sheets. *Curr. Biol.* **10**, 831-838 (2000).
- 705 17. M. Schafer, S. Werner, Cancer as an overhealing wound: an old hypothesis revisited. *Nat Rev Mol Cell Biol*  
706 **9**, 628-638 (2008).
- 707 18. P. Martin, Wound healing--aiming for perfect skin regeneration. *Science* **276**, 75-81 (1997).
- 708 19. R. F. Diegelmann, M. C. Evans, Wound healing: an overview of acute, fibrotic and delayed healing. *Front*  
709 *Biosci* **9**, 283-289 (2004).
- 710 20. J. E. Repine, C. C. Clawson, F. C. Goetz, Bactericidal function of neutrophils from patients with acute  
711 bacterial infections and from diabetics. *The Journal of infectious diseases* **142**, 869-875 (1980).
- 712 21. S. Gallacher *et al.*, Neutrophil bactericidal function in diabetes mellitus: evidence for association with  
713 blood glucose control. *Diabetic medicine* **12**, 916-920 (1995).
- 714 22. M. Delamair *et al.*, Impaired leucocyte functions in diabetic patients. *Diabetic Medicine* **14**, 29-34 (1997).
- 715 23. C. Wetzler, H. Kampfer, B. Stallmeyer, J. Pfeilschifter, S. Frank, Large and sustained induction of  
716 chemokines during impaired wound healing in the genetically diabetic mouse: prolonged persistence of  
717 neutrophils and macrophages during the late phase of repair. *The Journal of investigative dermatology* **115**,  
718 245-253 (2000).
- 719 24. T. Bjarnsholt *et al.*, Why chronic wounds will not heal: a novel hypothesis. *Wound repair and regeneration*  
720 *: official publication of the Wound Healing Society [and] the European Tissue Repair Society* **16**, 2-10  
721 (2008).
- 722 25. S. Wood *et al.*, Pro-inflammatory chemokine CCL2 (MCP-1) promotes healing in diabetic wounds by  
723 restoring the macrophage response. *PLoS one* **9**, e91574 (2014).
- 724 26. S. L. Wong *et al.*, Diabetes primes neutrophils to undergo NETosis, which impairs wound healing. *Nat*  
725 *Med* **21**, 815-819 (2015).
- 726 27. J. S. Kroin *et al.*, Perioperative high inspired oxygen fraction therapy reduces surgical site infection with  
727 *Pseudomonas aeruginosa* in rats. *Journal of medical microbiology*, (2016).

- 728 28. S. J. Klebanoff, Myeloperoxidase: friend and foe. *Journal of leukocyte biology* **77**, 598-625 (2005).
- 729 29. T. W. Kuijpers *et al.*, Membrane surface antigen expression on neutrophils: a reappraisal of the use of  
730 surface markers for neutrophil activation. *Blood* **78**, 1105-1111 (1991).
- 731 30. F. Atzeni *et al.*, Induction of CD69 activation molecule on human neutrophils by GM-CSF, IFN-gamma,  
732 and IFN-alpha. *Cellular immunology* **220**, 20-29 (2002).
- 733 31. S. de Oliveira, E. E. Rosowski, A. Huttenlocher, Neutrophil migration in infection and wound repair: going  
734 forward in reverse. *Nature reviews. Immunology* **16**, 378 (2016).
- 735 32. M. Liu *et al.*, Formylpeptide receptors are critical for rapid neutrophil mobilization in host defense against  
736 *Listeria monocytogenes*. *Scientific reports* **2**, 786 (2012).
- 737 33. C. D. Sadik, N. D. Kim, A. D. Luster, Neutrophils cascading their way to inflammation. *Trends in*  
738 *immunology* **32**, 452-460 (2011).
- 739 34. K. Futosi, S. Fodor, A. Mocsai, Neutrophil cell surface receptors and their intracellular signal transduction  
740 pathways. *Int Immunopharmacol* **17**, 638-650 (2013).
- 741 35. L. G. Ng *et al.*, Visualizing the neutrophil response to sterile tissue injury in mouse dermis reveals a three-  
742 phase cascade of events. *Journal of Investigative Dermatology* **131**, 2058-2068 (2011).
- 743 36. P. V. Afonso *et al.*, LTB4 is a signal-relay molecule during neutrophil chemotaxis. *Developmental cell* **22**,  
744 1079-1091 (2012).
- 745 37. R. C. Chou *et al.*, Lipid-cytokine-chemokine cascade drives neutrophil recruitment in a murine model of  
746 inflammatory arthritis. *Immunity* **33**, 266-278 (2010).
- 747 38. K. M. Roupe *et al.*, Injury is a major inducer of epidermal innate immune responses during wound healing.  
748 *The Journal of investigative dermatology* **130**, 1167-1177 (2010).
- 749 39. Y. Su, A. Richmond, Chemokine regulation of neutrophil infiltration of skin wounds. *Advances in wound*  
750 *care* **4**, 631-640 (2015).
- 751 40. A. D. Luster, R. Alon, U. H. von Andrian, Immune cell migration in inflammation: present and future  
752 therapeutic targets. *Nature immunology* **6**, 1182-1190 (2005).
- 753 41. E. J. Rayfield *et al.*, Infection and diabetes: the case for glucose control. *The American journal of medicine*  
754 **72**, 439-450 (1982).
- 755 42. R. Latham, A. D. Lancaster, J. F. Covington, J. S. Pirolo, C. S. Thomas, The association of diabetes and  
756 glucose control with surgical-site infections among cardiothoracic surgery patients. *Infection Control &*  
757 *Hospital Epidemiology* **22**, 607-612 (2001).
- 758 43. K. J. Zerr *et al.*, Glucose control lowers the risk of wound infection in diabetics after open heart operations.  
759 *The Annals of thoracic surgery* **63**, 356-361 (1997).
- 760 44. J. S. Kroin *et al.*, Short-Term Glycemic Control Is Effective in Reducing Surgical Site Infection in Diabetic  
761 Rats. *Anesthesia and analgesia*, (2015).
- 762 45. J. Gomez-Cambronero, J. Horn, C. C. Paul, M. A. Baumann, Granulocyte-macrophage colony-stimulating  
763 factor is a chemoattractant cytokine for human neutrophils: involvement of the ribosomal p70 S6 kinase  
764 signaling pathway. *The Journal of Immunology* **171**, 6846-6855 (2003).
- 765 46. A. Burnett *et al.*, Angiopoietin-1 enhances neutrophil chemotaxis in vitro and migration in vivo through  
766 interaction with CD18 and release of CCL4. *Scientific reports* **7**, 1-9 (2017).
- 767 47. B. Heit, S. Tavener, E. Raharjo, P. Kubes, An intracellular signaling hierarchy determines direction of  
768 migration in opposing chemotactic gradients. *The Journal of cell biology* **159**, 91-102 (2002).
- 769 48. E. Hirsch *et al.*, Central role for G protein-coupled phosphoinositide 3-kinase  $\gamma$  in inflammation. *Science*  
770 **287**, 1049-1053 (2000).
- 771 49. T. Lammermann *et al.*, Neutrophil swarms require LTB4 and integrins at sites of cell death in vivo. *Nature*  
772 **498**, 371-375 (2013).
- 773 50. S. Park, J. Rich, F. Hanses, J. C. Lee, Defects in innate immunity predispose C57BL/6J-Leprdb/Leprdb  
774 mice to infection by *Staphylococcus aureus*. *Infection and immunity* **77**, 1008-1014 (2009).
- 775 51. C. D. Ramos *et al.*, MIP-1alpha[CCL3] acting on the CCR1 receptor mediates neutrophil migration in  
776 immune inflammation via sequential release of TNF-alpha and LTB4. *Journal of leukocyte biology* **78**,  
777 167-177 (2005).
- 778 52. J. M. da Silva *et al.*, Relevance of CCL3/CCR5 axis in oral carcinogenesis. *Oncotarget* **8**, 51024 (2017).
- 779 53. O. Yoshie, K. Matsushima, CCR4 and its ligands: from bench to bedside. *International immunology* **27**, 11-  
780 20 (2015).
- 781 54. C. A. Reichel *et al.*, Chemokine receptors Ccr1, Ccr2, and Ccr5 mediate neutrophil migration to  
782 postischemic tissue. *Journal of leukocyte biology* **79**, 114-122 (2006).
- 783 55. D. G. Armstrong, L. A. Lavery, L. B. Harkless, Validation of a diabetic wound classification system: the  
784 contribution of depth, infection, and ischemia to risk of amputation. *Diabetes care* **21**, 855-859 (1998).

- 785 56. A. L. Brubaker, J. L. Rendon, L. Ramirez, M. A. Choudhry, E. J. Kovacs, Reduced neutrophil chemotaxis  
786 and infiltration contributes to delayed resolution of cutaneous wound infection with advanced age. *The*  
787 *Journal of Immunology* **190**, 1746-1757 (2013).
- 788 57. A. V. Chintakuntlawar, J. Chodosh, Chemokine CXCL1/KC and its receptor CXCR2 are responsible for  
789 neutrophil chemotaxis in adenoviral keratitis. *Journal of Interferon & Cytokine Research* **29**, 657-666  
790 (2009).
- 791 58. H. Nozawa, C. Chiu, D. Hanahan, Infiltrating neutrophils mediate the initial angiogenic switch in a mouse  
792 model of multistage carcinogenesis. *Proceedings of the National Academy of Sciences of the United States*  
793 *of America* **103**, 12493-12498 (2006).
- 794 59. T. A. Wilgus, A. M. Ferreira, T. M. Oberyszyn, V. K. Bergdall, L. A. DiPietro, Regulation of scar  
795 formation by vascular endothelial growth factor. *Laboratory investigation* **88**, 579-590 (2008).
- 796 60. O. Skalli *et al.*, Myofibroblasts from diverse pathologic settings are heterogeneous in their content of actin  
797 isoforms and intermediate filament proteins. *Laboratory investigation; a journal of technical methods and*  
798 *pathology* **60**, 275-285 (1989).
- 799 61. F. Cheng *et al.*, Vimentin coordinates fibroblast proliferation and keratinocyte differentiation in wound  
800 healing via TGF- $\beta$ -Slug signaling. *Proceedings of the National Academy of Sciences* **113**, E4320-E4327  
801 (2016).
- 802 62. D. Yue *et al.*, Abnormalities of granulation tissue and collagen formation in experimental diabetes, uraemia  
803 and malnutrition. *Diabetic medicine* **3**, 221-225 (1986).
- 804 63. R. Augustine, N. Kalarikkal, S. Thomas, Role of wound dressings in the management of chronic and acute  
805 diabetic wounds. *Diabetes Mellit Hum Health Care Holist Approach Diagn Treat*, 273-314 (2014).
- 806 64. B. Hinz, Masters and servants of the force: the role of matrix adhesions in myofibroblast force perception  
807 and transmission. *European journal of cell biology* **85**, 175-181 (2006).
- 808 65. S. Ambiru *et al.*, Poor postoperative blood glucose control increases surgical site infections after surgery  
809 for hepato-biliary-pancreatic cancer: a prospective study in a high-volume institute in Japan. *Journal of*  
810 *Hospital Infection* **68**, 230-233 (2008).
- 811 66. D. Sadoskas, N. C. Suder, D. K. Wukich, Perioperative Glycemic Control and the Effect on Surgical Site  
812 Infections in Diabetic Patients Undergoing Foot and Ankle Surgery. *Foot & ankle specialist* **9**, 24-30  
813 (2016).
- 814 67. M. S. Golinko *et al.*, Operative debridement of diabetic foot ulcers. *Journal of the American College of*  
815 *Surgeons* **207**, e1-e6 (2008).
- 816 68. E. Lebrun, M. Tomic-Canic, R. S. Kirsner, The role of surgical debridement in healing of diabetic foot  
817 ulcers. *Wound repair and regeneration* **18**, 433-438 (2010).
- 818 69. M. Cardinal *et al.*, Serial surgical debridement: a retrospective study on clinical outcomes in chronic lower  
819 extremity wounds. *Wound Repair and Regeneration* **17**, 306-311 (2009).
- 820 70. W. Yang *et al.*, Neutrophils promote the development of reparative macrophages mediated by ROS to  
821 orchestrate liver repair. *Nature communications* **10**, 1076 (2019).
- 822 71. S. H. Shafikhani, J. Engel, *Pseudomonas aeruginosa* type III-secreted toxin ExoT inhibits host-cell division  
823 by targeting cytokinesis at multiple steps. *Proceedings of the National Academy of Sciences of the United*  
824 *States of America* **103**, 15605-15610 (2006).
- 825 72. S. J. Wood, J. Goldufsky, S. H. Shafikhani, *Pseudomonas aeruginosa* ExoT Induces Atypical Anoikis  
826 Apoptosis in Target Host Cells by Transforming Crk Adaptor Protein into a Cytotoxin. *PLoS pathogens* **11**,  
827 e1004934 (2015).
- 828 73. J. F. Almine, S. G. Wise, A. S. Weiss, Elastin signaling in wound repair. *Birth Defects Research Part C:*  
829 *Embryo Today: Reviews* **96**, 248-257 (2012).
- 830 74. R. F. Diegelmann, From the selected works of Robert F. Diegelmann Ph. D. *Front biosci* **9**, 283-289  
831 (2004).
- 832 75. M. Swamydas, Y. Luo, M. E. Dorf, M. S. Lionakis, Isolation of mouse neutrophils. *Current protocols in*  
833 *immunology* **110**, 3.20. 21-23.20. 15 (2015).
- 834 76. F. J. Kohlhapp *et al.*, CD8(+) T cells sabotage their own memory potential through IFN-gamma-dependent  
835 modification of the IL-12/IL-15 receptor alpha axis on dendritic cells. *Journal of immunology* **188**, 3639-  
836 3647 (2012).
- 837 77. A. Zloza *et al.*, NKG2D signaling on CD8(+) T cells represses T-bet and rescues CD4-unhelped CD8(+) T  
838 cell memory recall but not effector responses. *Nature medicine* **18**, 422-428 (2012).
- 839 78. H. Hackstein *et al.*, Heterogeneity of respiratory dendritic cell subsets and lymphocyte populations in  
840 inbred mouse strains. *Respiratory research* **13**, 94 (2012).
- 841 79. K. W. Bruhn, K. Dekitani, T. B. Nielsen, P. Pantapalangkoor, B. Spellberg, Ly6G-mediated depletion of  
842 neutrophils is dependent on macrophages. *Results in immunology* **6**, 5-7 (2016).

- 843 80. M. F. Mohamed *et al.*, *Pseudomonas aeruginosa* ExoT Induces G1 Cell Cycle Arrest in Melanoma Cells.  
844 *Cell Microbiol.*, e13339 (2021).  
845 81. S. Wood, G. Sivaramakrishnan, J. Engel, S. H. Shafikhani, Cell migration regulates the kinetics of  
846 cytokinesis. *Cell Cycle* **10**, 648-654 (2011).  
847 82. S. J. Wood, J. W. Goldufsky, D. Bello, S. Masood, S. H. Shafikhani, *Pseudomonas aeruginosa* ExoT  
848 induces mitochondrial apoptosis in target host cells in a manner that depends on its GAP domain activity.  
849 *The Journal of biological chemistry*, (2015).  
850

851

852
